# Supplementary material
Source: publisher figshare collection journal article supplement (https://acs.figshare.com/ndownloader/files/4743388)
Supplement: Supplementary file 1 [file 4743388]

# Total Synthesis of Narbonolide and Biotransformation to Pikromycin

*Lakshmanan Venkatraman,<sup>†</sup> Christine E. Salomon,<sup>‡</sup> David H. Sherman,<sup>§</sup> and Robert A. Fecik<sup>\*,†</sup>*

<sup>†</sup>Department of Medicinal Chemistry, 308 Harvard Street S.E., 8-101 WDH, University of Minnesota,  
Minneapolis, Minnesota 55455-0353, <sup>‡</sup>Department of Microbiology, 420 Delaware Street S.E.,  
University of Minnesota, Minneapolis, Minnesota 55455, and <sup>§</sup>University of Michigan Life Sciences  
Institute, Departments of Medicinal Chemistry, Microbiology & Immunology, and Chemistry, 210  
Washtenaw Avenue, Ann Arbor, Michigan 48109-2216

fecik001@umn.edu

## Table of Contents

General procedures\_\_\_\_\_ S3

Experimental procedures and spectral data:

Aldol adduct **5**\_\_\_\_\_ S3

Diol **6**\_\_\_\_\_ S4

Ketal **7**\_\_\_\_\_ S4

PMB ether **8**\_\_\_\_\_ S5

Aldehyde **9**\_\_\_\_\_ S5

Carboxylic acid **11**\_\_\_\_\_ S6

Ester **13**\_\_\_\_\_ S6

Alcohol **14**\_\_\_\_\_ S7

|                                                    |     |
|----------------------------------------------------|-----|
| Aldehyde <b>15</b>                                 | S8  |
| Allylic alcohol <b>16</b>                          | S8  |
| Ketone <b>17</b> (from allylic alcohol <b>16</b> ) | S9  |
| Aldehyde <b>18</b>                                 | S10 |
| Ketone <b>17</b> (from diol <b>19</b> )            | S10 |

<sup>1</sup>H and <sup>13</sup>C NMR spectra:

|                           |     |
|---------------------------|-----|
| Aldol adduct <b>5</b>     | S12 |
| Diol <b>6</b>             | S13 |
| Ketal <b>7</b>            | S14 |
| PMB ether <b>8</b>        | S15 |
| Aldehyde <b>9</b>         | S16 |
| Alcohol <b>10</b>         | S17 |
| Carboxylic acid <b>11</b> | S18 |
| Ester <b>13</b>           | S19 |
| Alcohol <b>14</b>         | S20 |
| Aldehyde <b>15</b>        | S21 |
| Allylic alcohol <b>16</b> | S22 |
| Ketone <b>17</b>          | S23 |
| Narbornolide ( <b>1</b> ) | S24 |
| Aldehyde <b>18</b>        | S25 |
| Allylic alcohol <b>19</b> | S26 |

LC-MS and MS (ESI –) spectra:

|                         |     |
|-------------------------|-----|
| Pikromycin ( <b>3</b> ) | S27 |
|-------------------------|-----|

|            |     |
|------------|-----|
| References | S28 |
|------------|-----|

**General Procedures.** All commercial reagents were used as provided unless otherwise indicated. The Dess–Martin periodinane<sup>1</sup> was synthesized according to the modified method of Ireland.<sup>2</sup> THF, Et<sub>2</sub>O, and CH<sub>2</sub>Cl<sub>2</sub> were purified by passage through alumina columns. All reactions were performed under an inert atmosphere of dry N<sub>2</sub> in oven-dried (150 °C) glassware. Optical rotations were determined on a polarimeter using the sodium D line ( $\lambda$  = 589 nm) at the temperature indicated and are reported as follows:  $[\alpha]_D^{\text{temp}}$ , concentration ( $c$  = g/100 mL), and solvent. Proton chemical shifts are reported in ppm from an internal standard of residual chloroform (7.26 ppm), and carbon chemical shifts are reported using an internal standard of residual chloroform (77.0 ppm). Proton chemical data are reported as follows: chemical shift, multiplicity (ovlp = overlapping, s = singlet, d = doublet, t = triplet, q = quartet, p = pentet, m = multiplet, br = broad), coupling constant, and integration. High resolution mass spectra were obtained by ESI-TOF/MS using either PEG or PPG standards as high resolution calibrants. HPLC analyses were performed with a diode array and multiple wavelength detector. LC-MS data were obtained with a UV6000L diode array detector and an electrospray-ion trap mass spectrometer for ESI.

**(*R*)-3-((2*S*,3*S*,4*S*,6*R*)-3-Hydroxy-2,4,6-trimethyl-7-(triisopropylsilyloxy)heptanoyl)-4-benzyloxazolin-2-one (5).** To a solution of *R*-4-benzyl-3-propionyl-2-oxazolidinone (2.33 g, 10 mmol, 1.0 equiv) in CH<sub>2</sub>Cl<sub>2</sub> at –78 °C was added freshly distilled Bu<sub>2</sub>BOTf (3.0 mL, 12 mmol, 1.2 equiv). After 15 min, distilled *i*-Pr<sub>2</sub>NEt (2.3 mL, 13.0 mmol, 1.3 equiv) was added, and the temperature was raised to 0 °C and stirred for 1 h. The mixture was cooled back to –78 °C and a solution of aldehyde **4**<sup>3</sup> (2.84 g, 10.0 mmol, 1.0 equiv) in CH<sub>2</sub>Cl<sub>2</sub> (10 mL) was added. The reaction mixture was stirred at –78 °C for 30 min, followed by stirring at –10 °C for 2 h. The reaction was quenched by the addition of pH 7 phosphate buffer (1 M, 10 mL) and MeOH (25 mL). The mixture was treated with a solution of 30% H<sub>2</sub>O<sub>2</sub> (9 mL) and MeOH (17 mL) and extracted with Et<sub>2</sub>O (5 × 15 mL). Purification by flash chromatography (20% EtOAc/hexanes) afforded the title compound (4.07 g, 78% yield) as a colorless oil.  $R_f$  = 0.46 (20% EtOAc/hexanes);  $[\alpha]_D^{23}$  = –40.56 ( $c$  = 0.53, CH<sub>2</sub>Cl<sub>2</sub>); <sup>1</sup>H NMR (CDCl<sub>3</sub>, 300 MHz)  $\delta$  7.24–7.37 (m, 3H), 7.19–7.22 (m, 2H), 4.64–4.72 (m, 1H), 4.15–4.24 (m, 2H), 3.96 (dq,  $J$  = 2.1, 6.9 Hz,

1H), 3.55–3.62 (m, 2H), 3.44 (dd,  $J = 5.7, 9.3$  Hz, 1H), 3.27 (dd,  $J = 3.6, 13.5$  Hz, 1H), 2.77 (dd,  $J = 9.3, 13.5$  Hz, 2H), 1.64–1.84 (ovlp, 4H), 1.21 (d,  $J = 6.9$  Hz, 3H), 1.03–1.16 (ovlp, 21H), 0.95 (d,  $J = 6.3$  Hz, 3H), 0.90 (d,  $J = 6.6$  Hz, 3H);  $^{13}\text{C}$  NMR ( $\text{CDCl}_3$ , 75 MHz)  $\delta$  177.7, 153.1, 135.3, 129.6, 129.2, 127.6, 76.4, 68.5, 66.4, 55.6, 40.1, 38.2, 38.1, 34.4, 34.0, 19.4, 18.5, 16.6, 12.4, 9.9; HRMS calcd for ( $\text{C}_{29}\text{H}_{49}\text{NO}_5\text{Si} + \text{Na}^+$ ): 542.3278, found 542.3275.

**(2S,3S,4S,6R)-2,4,6-Trimethyl-7-(triisopropylsilyloxy)heptane-1,3-diol (6).** To a solution of aldol adduct **5** (3.63 g, 7.0 mmol) in THF (35 mL) at 0 °C was added MeOH (0.27 mL) and  $\text{LiBH}_4$  (2 M solution in THF, 3.5 mL, 7.0 mmol, 1.0 equiv), and the reaction was stirred for 45 min. The reaction was quenched by the addition of saturated aqueous sodium potassium tartrate (35 mL) and stirred vigorously as it was warmed to room temperature. The reaction mixture was extracted with  $\text{CH}_2\text{Cl}_2$  (3  $\times$  50 mL). The combined organic extracts were washed with saturated aqueous NaCl (20 mL), dried ( $\text{Na}_2\text{SO}_4$ ), filtered, and concentrated under reduced pressure. Purification by flash chromatography (30% EtOAc/hexanes) afforded the title compound (2.13 g, 88% yield) as a colorless oil.  $R_f = 0.43$  (30% EtOAc/hexanes);  $[\alpha]_D^{23} = +10.53$  ( $c = 0.94$ ,  $\text{CH}_2\text{Cl}_2$ );  $^1\text{H}$  NMR ( $\text{CDCl}_3$ , 300 MHz)  $\delta$  3.77 (dd,  $J = 3.6, 10.5$  Hz, 1H), 3.68 (dd,  $J = 5.4, 10.5$  Hz, 1H), 3.46–3.58 (ovlp, 3H), 2.27 (br s, 2H), 1.58–1.88 (m, 4H), 1.03–1.14 (ovlp, 21H), 0.89–1.02 (ovlp, 7H), 0.84 (d,  $J = 7.2$  Hz, 3H);  $^{13}\text{C}$  NMR ( $\text{CDCl}_3$ , 75 MHz)  $\delta$  80.3, 68.5, 68.4, 38.6, 36.3, 35.2, 34.3, 19.4, 18.4, 17.4, 12.4, 9.3; HRMS calcd for ( $\text{C}_{19}\text{H}_{42}\text{O}_3\text{Si} + \text{Na}^+$ ): 369.2801, found 369.2804.

**(2R,4S)-4-((2'R,4'S,5'S)-2'-(4-Methoxyphenyl)-5'-methyl-1',3'-dioxan-4-yl)-2-methyl-1-(triisopropylsilyloxy)pentane (7).** To a solution of diol **6** (2.13 g, 6.16 mmol) in  $\text{CH}_2\text{Cl}_2$  (40 mL) at room temperature was added *p*-anisaldehyde dimethylacetal (1.35 g, 7.4 mmol, 1.2 equiv) and CSA (0.07 g, 0.31 mmol, 0.05 equiv) and the reaction was stirred for 12h. The reaction was quenched by the addition of saturated aqueous  $\text{NaHCO}_3$  (15 mL). The layers were separated and the aqueous layer was extracted with  $\text{CH}_2\text{Cl}_2$  (3  $\times$  20 mL). The combined organic layers were washed with saturated aqueous NaCl (20 mL), dried ( $\text{MgSO}_4$ ), filtered and concentrated under reduced pressure. Purification by flash

chromatography (15% EtOAc/hexanes) afforded the title compound (2.64 g, 92% yield) as a colorless oil whose spectral data corresponded to those reported.<sup>4</sup>

**(2S,3S,4S,6R)-3-(4-Methoxybenzyloxy)-2,4,6-trimethyl-7-(triisopropylsilyloxy)heptan-1-ol (8).** A solution of cyclic acetal **7** (1.86 g, 4.0 mmol) in toluene (20 mL) at 0 °C was treated dropwise with DIBAL-H (1.0 M solution in toluene, 12 mL, 12 mmol, 3.0 equiv) and stirred for 1 h. The reaction was quenched by the addition of EtOAc (12 mL) and saturated aqueous sodium potassium tartrate (12 mL). The mixture was warmed to room temperature and stirred vigorously for 6 h. The mixture was extracted with Et<sub>2</sub>O (3 × 30 mL), and the combined organic layers were washed with saturated aqueous NaCl (10 mL), dried (MgSO<sub>4</sub>), filtered, and concentrated under reduced pressure. Purification by flash chromatography (20% EtOAc/hexanes) afforded the title compound (1.75 g, 94% yield) as a colorless oil whose spectral data corresponded to those reported.<sup>4</sup>

**(2S,3S,4S,6R)-3-(4-Methoxybenzyloxy)-2,4,6-trimethyl-7-(triisopropylsilyloxy)heptanal (9).** To solution of (COCl)<sub>2</sub> (0.50 mL, 5.7 mmol, 1.5 equiv) in CH<sub>2</sub>Cl<sub>2</sub> (15 mL) at –78 °C was added dropwise a solution of DMSO (0.81 mL, 11.4 mmol, 3.0 equiv) in CH<sub>2</sub>Cl<sub>2</sub> (5 mL). After 15 min the cloudy solution was treated with a solution of alcohol **8** (1.77 g, 3.8 mmol) in CH<sub>2</sub>Cl<sub>2</sub> (25 mL). The reaction was stirred for 15 min at –78 °C, then treated with *i*-Pr<sub>2</sub>NEt (3.3 mL, 19.0 mmol, 5.0 equiv). After stirring for 30 min at –78 °C, the reaction mixture was warmed to 0 °C and stirred for 1 h. The reaction was quenched by the addition of saturated aqueous NH<sub>4</sub>Cl (20 mL) and the mixture was slowly warmed to room temperature. The layers were separated and the aqueous layer was extracted with CH<sub>2</sub>Cl<sub>2</sub> (3 × 30 mL). The combined organic layers were washed with saturated aqueous NaCl (15 mL), dried (Na<sub>2</sub>SO<sub>4</sub>), filtered, and concentrated under reduced pressure. Purification by flash chromatography (10% EtOAc/hexanes) afforded the title compound (1.52 g, 86% yield) as a colorless oil. *R*<sub>f</sub> = 0.53 (10% EtOAc/hexanes); [α]<sub>D</sub><sup>23</sup> = –16.59 (*c* = 0.91, CH<sub>2</sub>Cl<sub>2</sub>); <sup>1</sup>H NMR (CDCl<sub>3</sub>, 300 MHz) δ 9.72 (s, 1H), 7.20 (d, *J* = 8.7 Hz, 2H), 6.84 (d, *J* = 8.7 Hz, 2H), 4.38 (AB system, *J* = 10.8 Hz, *v*<sub>AB</sub> = 23.4, 2H), 3.79 (s, 3H), 3.66 (dd, *J* = 3.6, 6.3 Hz, 1H), 3.53 (dd, *J* = 5.1, 6.3 Hz, 1H), 3.42 (dd, *J* = 6.3, 9.3 Hz, 1H), 2.53–

2.62 (m, 1H), 1.95 (m, 1H), 1.52–1.75 (ovlp, 2H), 1.16 (d,  $J = 6.9$  Hz, 3H), 1.02–1.09 (ovlp, 22H), 0.94 (d,  $J = 6.6$  Hz, 3H), 0.93 (d,  $J = 6.6$  Hz, 3H);  $^{13}\text{C}$  NMR ( $\text{CDCl}_3$ , 75 MHz)  $\delta$  204.9, 159.3, 130.7, 129.4, 113.9, 82.0, 73.1, 68.3, 55.6, 49.1, 37.5, 33.9, 18.9, 18.5, 18.1, 17.2, 12.4, 8.9; HRMS calcd for ( $\text{C}_{27}\text{H}_{48}\text{O}_4\text{Si} + \text{Na}^+$ ): 487.3220, found 487.3218.

**(2*R*,3*S*,4*S*,5*S*,6*S*,8*R*)-3-Hydroxy-5-(4-methoxybenzyloxy)-2,4,6,8-tetramethyl-9-**

**(triisopropylsilyloxy)nonanoic acid (11).** To a solution of oxazolidinone **10** (1.05 g, 1.5 mmol) in THF (16 mL) and  $\text{H}_2\text{O}$  (4 mL) at 0 °C was added 30% aqueous  $\text{H}_2\text{O}_2$  (1.7 mL, 15.0 mmol, 10.0 equiv) and aqueous LiOH (1 M, 4.5 mL, 4.5 mmol, 3.0 equiv). After 1 h the solution was warmed to room temperature and stirred for an additional 6 h. The solution was cooled to 0 °C and treated with aqueous  $\text{Na}_2\text{SO}_3$  (1.5 M, 10 mL). After 10 min, the mixture was diluted with EtOAc (20 mL) and acidified to pH 1 with 1 M HCl. The layers were separated and the aqueous layer was extracted with EtOAc (3  $\times$  20 mL). The combined organic layers were washed with saturated aqueous NaCl (10 mL), dried ( $\text{Na}_2\text{SO}_4$ ), filtered, and concentrated under reduced pressure. Purification by flash chromatography (5% MeOH/ $\text{CH}_2\text{Cl}_2$ ) afforded the title compound (0.66 g, 82% yield) as a colorless oil.  $R_f = 0.35$  (5% MeOH/ $\text{CH}_2\text{Cl}_2$ );  $[\alpha]_{\text{D}}^{23} = + 5.78$  ( $c = 1.80$ ,  $\text{CH}_2\text{Cl}_2$ );  $^1\text{H}$  NMR ( $\text{CDCl}_3$ , 300 MHz)  $\delta$  7.26 (d,  $J = 8.7$  Hz, 2H), 6.87 (d,  $J = 8.7$  Hz, 2H), 4.52 (AB system,  $J = 10.7$  Hz,  $\nu_{\text{AB}} 75.3$ , 2H), 3.93 (dd,  $J = 2.4$ , 8.4 Hz, 1H), 3.80 (s, 3H), 3.57 (dd,  $J = 5.1$ , 9.6 Hz, 1H), 3.47 (dd,  $J = 5.7$ , 9.6 Hz, 1H), 3.36 (dd,  $J = 2.4$ , 6.6 Hz, 1H), 2.67 (pent,  $J = 7.2$  Hz, 1H), 2.07–2.14 (m, 1H), 1.87–1.94 (m, 1H), 1.70–1.78 (m, 1H), 1.58–1.67 (m, 1H), 1.25 (d,  $J = 6.9$  Hz, 3H), 1.01–1.19 (ovlp, 23H), 0.97 (d,  $J = 7.2$  Hz, 3H), 0.96 (d,  $J = 6.3$  Hz, 3H), 0.95 (d,  $J = 6.6$  Hz, 3H);  $^{13}\text{C}$  NMR ( $\text{CDCl}_3$ , 75 MHz)  $\delta$  180.5, 159.4, 130.4, 129.6, 114.1, 87.9, 76.7, 73.2, 68.3, 55.6, 43.3, 37.6, 37.0, 33.8, 33.3, 19.1, 18.5, 16.8, 13.8, 12.4, 8.1; HRMS calcd for ( $\text{C}_{30}\text{H}_{54}\text{O}_6\text{Si} + \text{Na}^+$ ): 561.3587, found 561.3593.

**(2*R*,3*S*,4*S*,5*S*,6*S*,8*R*)-((3*R*,4*R*,5*E*)-6-Iodo-4-methylhex-5-en-3-yl)**

**3-hydroxy-5-(4-**

**methoxybenzyloxy)-2,4,6,8-tetramethyl-9-(triisopropylsilyloxy)nonanoate (13).** To a solution of acid **11** (0.81 g, 1.50 mmol) in THF (15 mL) at room temperature was added 2,4,6-

trichlorobenzoylchloride (0.25 mL, 1.65 mmol, 1.1 equiv) and Et<sub>3</sub>N (0.22 mL, 1.58 mmol, 1.05 equiv). After stirring for 3 h, the solids were filtered and washed with hexanes. The solvents were removed under reduced pressure and the residue was dissolved in benzene (20 mL). To this solution was added vinyl iodide **12**<sup>4</sup> (0.43 g, 1.80 mmol, 1.20 equiv) in benzene (10 mL) and DMAP (0.25 g, 2.03 mmol, 1.35 equiv), and the reaction was stirred at room temperature for 24 h. The reaction was diluted with Et<sub>2</sub>O (100 mL), washed with saturated aqueous NaHCO<sub>3</sub> (15 mL) and saturated aqueous NaCl (10 mL), dried (MgSO<sub>4</sub>), filtered, and concentrated under reduced pressure. Purification by flash chromatography (20% EtOAc/hexanes) afforded the title compound (0.69 g, 61% yield) as a colorless oil. *R*<sub>f</sub> = 0.41 (20% EtOAc/hexanes); [ $\alpha$ ]<sub>D</sub><sup>23</sup> = + 28.80 (*c* = 1.00, CH<sub>2</sub>Cl<sub>2</sub>); <sup>1</sup>H NMR (CDCl<sub>3</sub>, 300 MHz)  $\delta$  7.25 (d, *J* = 8.4 Hz, 2H), 6.87 (d, *J* = 8.7 Hz, 2H), 6.43 (dd, *J* = 7.8, 14.7 Hz, 1H), 6.08 (dd, *J* = 0.9, 14.7 Hz, 1H), 4.69–4.76 (m, 1H), 4.52 (AB system, *J* = 10.5 Hz, *v*<sub>AB</sub> 66.3, 2H), 3.88 (dd, *J* = 2.4, 8.7 Hz, 1H), 3.79 (s, 3H), 3.58 (dd, *J* = 4.8, 9.6 Hz, 1H), 3.45 (dd, *J* = 6.3, 9.6 Hz, 1H), 3.36 (dd, *J* = 2.4, 6.9 Hz, 1H), 2.59–2.69 (m, 1H), 2.42–2.48 (m, 1H), 2.03–2.10 (m, 1H), 1.44–1.82 (ovlp, 6H), 1.27 (d, *J* = 6.9 Hz, 3H), 1.03–1.11 (ovlp, 22H), 0.96–1.01 (ovlp, 6H), 0.95 (d, *J* = 6.6 Hz, 3H), 0.92 (d, *J* = 7.2 Hz, 3H), 0.86 (t, *J* = 7.5 Hz, 3H); <sup>13</sup>C NMR (CDCl<sub>3</sub>, 75 MHz)  $\delta$  175.1, 159.3, 147.4, 130.4, 129.4, 114.1, 88.4, 77.2, 77.1, 76.4, 72.9, 68.1, 55.6, 44.3, 43.9, 37.7, 37.2, 33.7, 33.3, 24.6, 19.2, 18.5, 16.5, 15.2, 14.8, 12.4, 10.3, 7.9; HRMS calcd for (C<sub>37</sub>H<sub>65</sub>IO<sub>6</sub>Si + Na<sup>+</sup>): 783.3493, found 783.3513.

**(2*R*,3*S*,4*S*,5*S*,6*S*,8*R*)-((3*R*,4*R*,5*E*)-6-Iodo-4-methylhex-5-en-3-yl) 3,9-dihydroxy-5-(4-methoxybenzyloxy)-2,4,6,8-tetramethylnonanoate (14).** To a solution of silyl ether **13** (0.27 g, 0.355 mmol) in pyridine (1.00 mL) and THF (15 mL) was added HF•pyridine (70% HF in pyridine, 2.00 mL). The reaction was stirred for 48 h at room temperature, diluted with Et<sub>2</sub>O (50 mL), washed with H<sub>2</sub>O (2 × 5 mL), saturated aqueous NaCl (5 mL), dried (MgSO<sub>4</sub>), filtered, and concentrated under reduced pressure. Purification by flash chromatography (40% EtOAc/hexanes) afforded the title compound (0.17 g, 79% yield) as a colorless oil. *R*<sub>f</sub> = 0.51 (40% EtOAc/hexanes); [ $\alpha$ ]<sub>D</sub><sup>23</sup> = +40.63 (*c* = 0.48, CH<sub>2</sub>Cl<sub>2</sub>); <sup>1</sup>H NMR (CDCl<sub>3</sub>, 300 MHz)  $\delta$  7.24 (d, *J* = 8.4 Hz, 2H), 6.84 (d, *J* = 8.4 Hz, 2H), 6.47 (dd, *J* = 8.1, 14.4 Hz,

1H), 6.06 (d,  $J = 14.4$  Hz, 1H), 4.73–4.79 (m, 1H), 4.55 (s, 2H), 4.07 (dd,  $J = 2.7, 9.3$  Hz, 1H), 3.77 (s, 3H), 3.49 (dd,  $J = 4.5, 10.5$  Hz, 1H), 3.31–3.40 (ovlp, 2H), 2.57–2.65 (m, 1H), 2.46 (sext,  $J = 6.6$  Hz, 1H), 1.41–1.91 (m, 8H), 1.12 (d,  $J = 7.2$  Hz, 3H), 1.03 (d,  $J = 6.6$  Hz, 3H), 0.99 (d,  $J = 6.9$  Hz, 3H), 0.97–0.99 (m, 1H), 0.94 (d,  $J = 6.6$  Hz, 3H), 0.83–0.84 (ovlp, 6H);  $^{13}\text{C}$  NMR ( $\text{CDCl}_3$ , 75 MHz)  $\delta$  175.3, 159.4, 147.7, 130.2, 129.7, 114.1, 89.7, 77.4, 76.2, 74.9, 74.6, 67.7, 55.6, 44.3, 42.6, 38.4, 35.9, 34.5, 33.7, 24.5, 18.8, 15.5, 15.4, 10.3, 9.1; HRMS calcd for ( $\text{C}_{28}\text{H}_{45}\text{IO}_6 + \text{Na}^+$ ): 627.2159, found 627.2183.

**(2*R*/S,3*S*,4*S*,5*S*,6*S*,8*R*)-((3*R*,4*R*,*E*)-6-Iodo-4-methylhex-5-en-3-yl) 3-hydroxy-5-(4-methoxybenzyloxy)-2,4,6,8-tetramethyl-9-oxononanoate (15).** To a solution of alcohol **14** (0.17 g, 0.282 mmol) in  $\text{CH}_2\text{Cl}_2$  (30 mL) at room temperature was added the Dess–Martin periodinane (0.48 g, 1.126 mmol, 4.0 equiv) and pyridine (1.25 mL). The reaction was stirred for 12 h and diluted with EtOAc (100 mL). The mixture was washed with saturated aqueous  $\text{NaHCO}_3$  (20 mL), 1 M aqueous  $\text{Na}_2\text{SO}_3$  (20 mL), and saturated aqueous  $\text{NaCl}$  (20 mL), dried ( $\text{Na}_2\text{SO}_4$ ), filtered, and concentrated under reduced pressure. Purification by flash chromatography (15% EtOAc/hexanes) afforded the title compound (0.131 g, 77% yield) as a colorless oil.  $R_f = 0.51$  (15% EtOAc/hexanes);  $^1\text{H}$  NMR ( $\text{CDCl}_3$ , 300 MHz)  $\delta$  9.56 (s, 1H), 7.14 (d,  $J = 8.4$  Hz, 2H), 6.82 (d,  $J = 8.7$  Hz, 2H), 6.39 (dd,  $J = 8.4, 14.7$  Hz, 1H), 6.07 (d,  $J = 14.1$  Hz, 1H), 4.72–4.78 (m, 1H), 4.32 (AB system,  $J = 10.8$  Hz,  $\nu_{\text{AB}} 49.2$ , 2H), 3.78 (s, 3H), 3.66–3.71 (m, 1H), 3.52 (dd,  $J = 1.5, 9.6$  Hz, 1H), 3.04–3.15 (m, 1H), 2.42–2.51 (m, 2H), 1.72–1.88 (m, 2H), 1.29–1.63 (ovlp, 3H), 1.20 (d,  $J = 6.9$  Hz, 3H), 1.12 (d,  $J = 7.2$  Hz, 3H), 1.05 (d,  $J = 6.6$  Hz, 3H), 1.04 (d,  $J = 6.6$  Hz, 3H), 0.98 (d,  $J = 6.9$  Hz, 3H), 0.85 (t,  $J = 7.2$  Hz, 3H);  $^{13}\text{C}$  NMR ( $\text{CDCl}_3$ , 75 MHz)  $\delta$  209.3, 204.9, 170.6, 159.3, 147.1, 130.7, 129.4, 113.9, 87.1, 78.4, 76.7, 74.9, 55.6, 54.7, 48.4, 44.4, 44.2, 44.0, 33.1, 32.1, 24.4, 18.1, 15.5, 15.2, 14.7, 12.8, 10.3; HRMS calcd for ( $\text{C}_{28}\text{H}_{41}\text{IO}_6 + \text{Na}^+$ ): 623.1846, found 623.1829.

**(2*R*/S,9*R*/S)-9-Dihydro-5-(4-methoxybenzyloxy)narbonolide (16).** To a solution of aldehyde **15** (130 mg, 0.2167 mmol) in DMSO (87 mL) at room temperature was added  $\text{CrCl}_2$  (266 mg, 2.1670 mmol, 10 equiv) and  $\text{NiCl}_2$  (2.7 mg, 0.0217 mmol, 0.1 equiv). The reaction was stirred for 12 h, then



quenched by the addition of H<sub>2</sub>O (40 mL). The mixture was diluted with EtOAc (500 mL) and the layers were separated. The organic layer was washed with H<sub>2</sub>O (3 × 50 mL) and saturated aqueous NaCl (20 mL), dried (Na<sub>2</sub>SO<sub>4</sub>), filtered, and concentrated under reduced pressure. Purification by flash chromatography (30% EtOAc/hexanes) afforded the title compound (91.0 mg, 89% yield) as a moist solid.  $R_f$  = 0.38 (30% EtOAc/hexanes); <sup>1</sup>H NMR (CDCl<sub>3</sub>, 300 MHz) δ 7.11 (d,  $J$  = 8.1 Hz, 2H), 6.83 (d,  $J$  = 8.4 Hz, 2H), 5.62–5.79 (m, 2H), 4.94–4.99 (m, 1H), 4.27 (AB system,  $J$  = 10.5 Hz,  $\nu_{AB}$  42.3, 2H), 4.04–4.06 (m, 1H), 3.78 (s, 3H), 3.51 (q,  $J$  = 6.6 Hz, 1H), 3.31–3.34 (m, 1H), 2.82–2.92 (m, 1H), 2.55 (br s, 1H), 1.47–1.81 (ovlp, 7H), 1.19 (d,  $J$  = 6.9 Hz, 3H), 1.11 (d,  $J$  = 6.9 Hz, 3H), 1.09 (d,  $J$  = 7.2 Hz, 3H), 1.07 (d,  $J$  = 6.9 Hz, 3H), 1.01 (d,  $J$  = 6.6 Hz, 3H), 0.89 (t,  $J$  = 7.2 Hz, 3H); <sup>13</sup>C NMR (CDCl<sub>3</sub>, 75 MHz) δ 208.9, 208.7, 170.0, 169.9, 159.2, 135.3, 133.2, 133.1, 131.1, 131.0, 130.7, 129.5, 113.9, 80.6, 80.5, 79.5, 79.1, 78.5, 75.3, 73.1, 72.5, 55.6, 54.1, 52.1, 51.4, 47.7, 46.8, 40.1, 39.2, 36.8, 36.6, 34.8, 33.8, 31.9, 29.6, 22.3, 21.2, 17.5, 17.2, 17.1, 16.9, 16.7, 15.6, 14.9, 14.4, 14.3, 11.4, 11.2; HRMS calcd for (C<sub>28</sub>H<sub>42</sub>O<sub>6</sub> + Na<sup>+</sup>): 497.2879, found 497.2853.

**5-(4-Methoxybenzyloxy)narbonolide (17).** To a solution of allylic alcohol **16** (28 mg, 0.059 mmol) in CH<sub>2</sub>Cl<sub>2</sub> (5 mL) at room temperature was added the Dess–Martin periodinane (75 mg, 0.177 mmol, 4.0 equiv) and pyridine (0.15 mL). The reaction was stirred for 18 h and diluted with EtOAc (40 mL). The mixture was washed with saturated aqueous NaHCO<sub>3</sub> (5 mL), 1M aqueous Na<sub>2</sub>SO<sub>3</sub> (5 mL), and saturated aqueous NaCl (5 mL), dried (Na<sub>2</sub>SO<sub>4</sub>), filtered, and concentrated under reduced pressure. Purification by flash chromatography (20% EtOAc/hexanes) afforded the title compound (24.7 mg, 88% yield) as a moist solid.  $R_f$  = 0.56 (20% EtOAc/hexanes);  $[\alpha]_D^{23}$  = + 86.44 ( $c$  = 0.59, CH<sub>2</sub>Cl<sub>2</sub>); <sup>1</sup>H NMR (CDCl<sub>3</sub>, 300 MHz) δ 7.27 (d,  $J$  = 8.4 Hz, 2H), 6.87 (d,  $J$  = 8.1 Hz, 2H), 6.74 (dd,  $J$  = 6.0, 15.6 Hz, 1H), 6.13 (d,  $J$  = 15.9 Hz, 1H), 4.91–4.94 (m, 1H), 4.48 (s, 2H), 3.89 (d,  $J$  = 6.3 Hz, 1H), 3.79–3.82 (ovlp, 4H), 2.84 (pent,  $J$  = 7.2 Hz, 1H), 2.58–2.69 (m, 2H), 1.48–1.66 (ovlp, 4H), 1.35 (d,  $J$  = 7.2 Hz, 3H), 1.28 (d,  $J$  = 7.2 Hz, 3H), 1.12–1.24 (m, 1H), 1.10 (d,  $J$  = 7.5 Hz, 3H), 1.07 (d,  $J$  = 6.9, 3H), 1.01 (d,  $J$  = 6.6 Hz, 3H), 0.90 (t,  $J$  = 7.2 Hz, 3H); <sup>13</sup>C NMR (CDCl<sub>3</sub>, 75 MHz) δ 208.2, 203.2, 169.6, 159.3, 147.8,

130.9, 129.5, 127.1, 113.9, 79.8, 78.7, 74.0, 55.6, 51.0, 49.6, 43.3, 38.8, 36.2, 23.6, 18.2, 16.4, 14.9, 14.7, 12.5, 10.9; HRMS calcd for (C<sub>28</sub>H<sub>40</sub>O<sub>6</sub> + Na<sup>+</sup>): 495.2723, found 495.2727.

**(2*R*,3*S*,4*S*,5*S*,6*S*,8*R*)-((3*R*,4*R*,*E*)-6-Iodo-4-methylhex-5-en-3-yl) 3-hydroxy-5-(4-methoxybenzyloxy)-2,4,6,8-tetramethyl-9-oxononanoate (18).** To a solution of diol **14** (30.2 mg, 0.05 mmol) in CH<sub>2</sub>Cl<sub>2</sub> (5 mL) was added saturated aqueous NaHCO<sub>3</sub> (2 mL) and a catalytic amount of KBr. The mixture was cooled to 0 °C, a catalytic amount of TEMPO was added, and was stirred vigorously and treated with aqueous NaOCl (0.25 M, 0.22 mL, 0.055 mmol, 1.1 equiv) and stirred for 20 min. The reaction was quenched by the addition of saturated aqueous Na<sub>2</sub>SO<sub>3</sub> (1 mL) and saturated aqueous NaHCO<sub>3</sub> (10 mL). The mixture was extracted with EtOAc (3 × 10 mL) and the combined organic layers were dried (MgSO<sub>4</sub>), filtered, and concentrated under reduced pressure. Purification by flash chromatography (30% EtOAc/hexanes) afforded the title compound (28 mg, 93% yield) as a colorless oil. *R*<sub>f</sub> = 0.61 (30% EtOAc/hexanes); [α]<sub>D</sub><sup>23</sup> = +40.42 (*c* = 0.48, CH<sub>2</sub>Cl<sub>2</sub>); <sup>1</sup>H NMR (CDCl<sub>3</sub>, 300 MHz) δ 9.54 (s, 1H), 7.26 (d, *J* = 8.4 Hz, 2H), 6.87 (d, *J* = 8.4 Hz, 2H), 6.43 (dd, *J* = 4.8, 14.4 Hz, 1H), 6.09 (d, *J* = 14.4 Hz, 1H), 4.70–4.76 (m, 1H), 4.53 (AB system, *J* = 10.5 Hz, *v*<sub>AB</sub> 30.3, 2H) 3.86–3.89 (m, 1H), 3.80 (s, 3H), 3.36 (dd, *J* = 3.0, 6.0 Hz, 1H), 3.03 (s, 1H), 2.66 (pent, *J* = 6.9 Hz, 1H), 2.39–2.52 (m, 2H), 1.75–2.07 (m, 3H), 1.42–1.66 (ovlp, 2H), 1.27 (d, *J* = 7.2 Hz, 3H), 1.15–1.22 (m, 1H), 1.11 (d, *J* = 6.9 Hz, 3H), 0.99 (d, *J* = 6.9 Hz, 3H), 0.98 (d, *J* = 7.2 Hz, 3H), 0.94 (d, *J* = 6.9 Hz, 3H), 0.86 (t, *J* = 7.2 Hz, 3H); <sup>13</sup>C NMR (CDCl<sub>3</sub>, 75 MHz) δ 205.2, 175.2, 159.4, 147.4, 130.2, 129.5, 114.2, 87.6, 77.3, 76.5, 76.4, 73.6, 55.6, 44.4, 44.1, 37.6, 34.5, 33.5, 24.6, 16.7, 15.3, 15.2, 14.8, 10.3, 8.1; HRMS calcd for (C<sub>28</sub>H<sub>43</sub>IO<sub>6</sub> + Na<sup>+</sup>): 625.2002, found 625.2010.

**5-(4-Methoxybenzyloxy)narbonolide (17).** To a solution of diol **19** (20.0 mg, 0.042 mmol) in CH<sub>2</sub>Cl<sub>2</sub> (8 mL) at room temperature was added the Dess–Martin periodinane (71.2 mg, 0.168 mmol, 4.0 equiv). The reaction was stirred for 4 h and diluted with EtOAc (40 mL). The mixture was washed with saturated aqueous NaHCO<sub>3</sub> (5 mL), 1 M Na<sub>2</sub>SO<sub>3</sub> (5 mL), and saturated aqueous NaCl (5 mL), dried (Na<sub>2</sub>SO<sub>4</sub>), filtered, and concentrated under reduced pressure. Purification by flash chromatography (20%

EtOAc/hexanes) afforded the title compound (17.6 mg, 88% yield) as a moist solid whose spectral data corresponded to those reported above.

LV-II-40 (aldol)

exp1 s2pu1

| SAMPLE      |             | SPECIAL    |          |
|-------------|-------------|------------|----------|
| date        | Jul 15 2005 | temp       | not used |
| solvent     | CDCl3       | gain       | not used |
| file        | exp         | spin       | 20       |
| ACQUISITION |             | hst        | 0.008    |
| sw          | 3601.0      | pw90       | 8.500    |
| at          | 1.998       | alpha      | 20.000   |
| np          | 14390       | FLAGS      |          |
| fb          | 2000        | l1         | n        |
| bs          | 16          | in         | n        |
| ss          | 2           | dp         | y        |
| d1          | 5.000       | hs         | nm       |
| nt          | 16          | PROCESSING |          |
| ct          | 16          | fn         | not used |
| TRANSMITTER |             | DISPLAY    |          |
| tn          | H1          | sp         | 59.4     |
| sfrq        | 300.059     | wp         | 2455.8   |
| tof         | 54.2        | rfl        | 300.2    |
| tpwr        | 60          | rpf        | 0        |
| pw          | 4.750       | rp         | 138.8    |
| DECOUPLER   |             | lp         | -38.9    |
| dn          | C13         | PLOT       |          |
| dof         | 0           | wc         | 250      |
| dm          | nmn         | sc         | 0        |
| dmm         | c           | vs         | 323      |
| dpwr        | 39          | th         | 46       |
| dmf         | 12300       | ai         | cdc ph   |

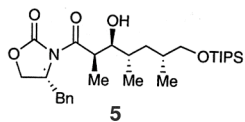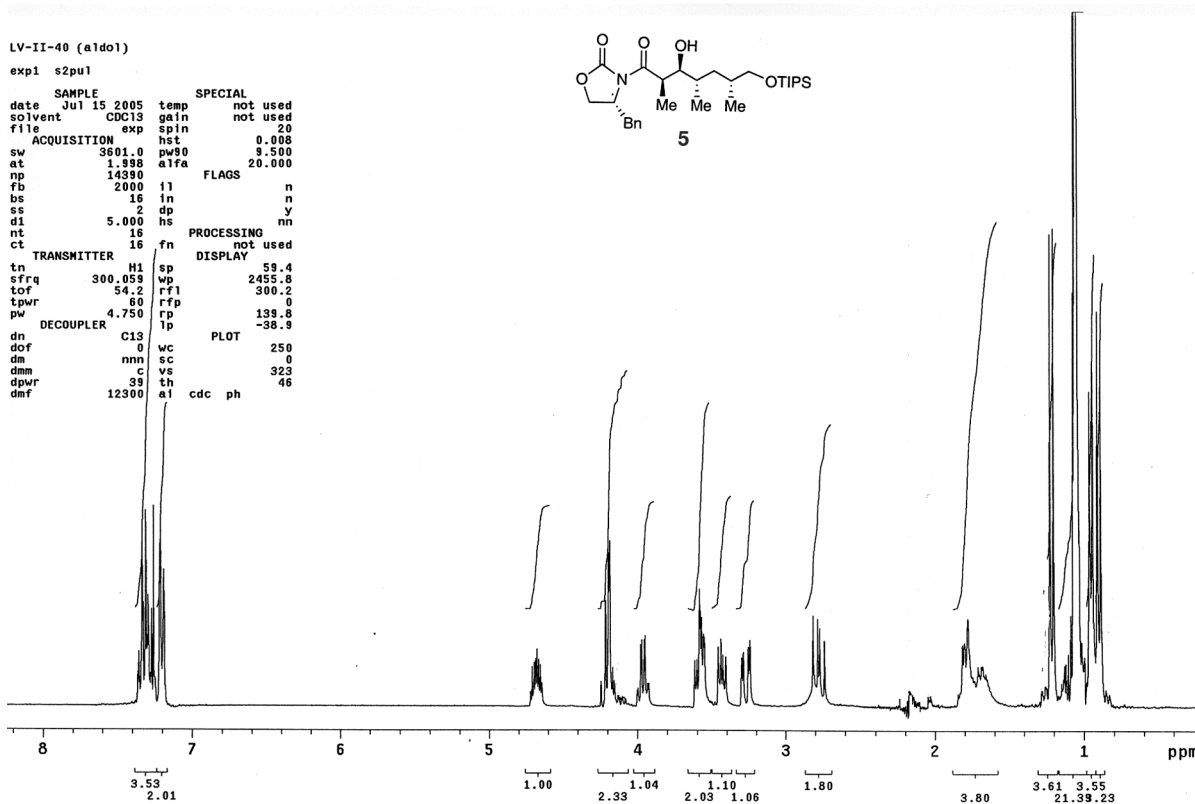

LV-II-40 (aldol)

Archive directory: /data/venkat/vnmrsys/data  
Sample directory: II-40\_15Jul2005  
File: CARBON

Pulse Sequence: s2pu1  
Solvent: CDCl3  
Ambient temperature  
Mercury-300BB "medicinal1"

Relax. delay 1.000 sec  
Pulse 45.0 degrees  
Acq. time 1.515 sec  
Width 18867.3 Hz  
881 repetitions  
OBSERVE C13, 75.4485244 MHz  
DECOUPLE H1, 300.0590418 MHz  
Power 38 dB  
continuously on  
WALTZ-16 modulated  
DATA PROCESSING  
Line broadening 1.0 Hz  
FT size 131072  
Total time 48 min, 47 sec

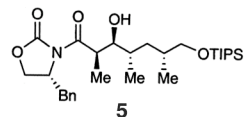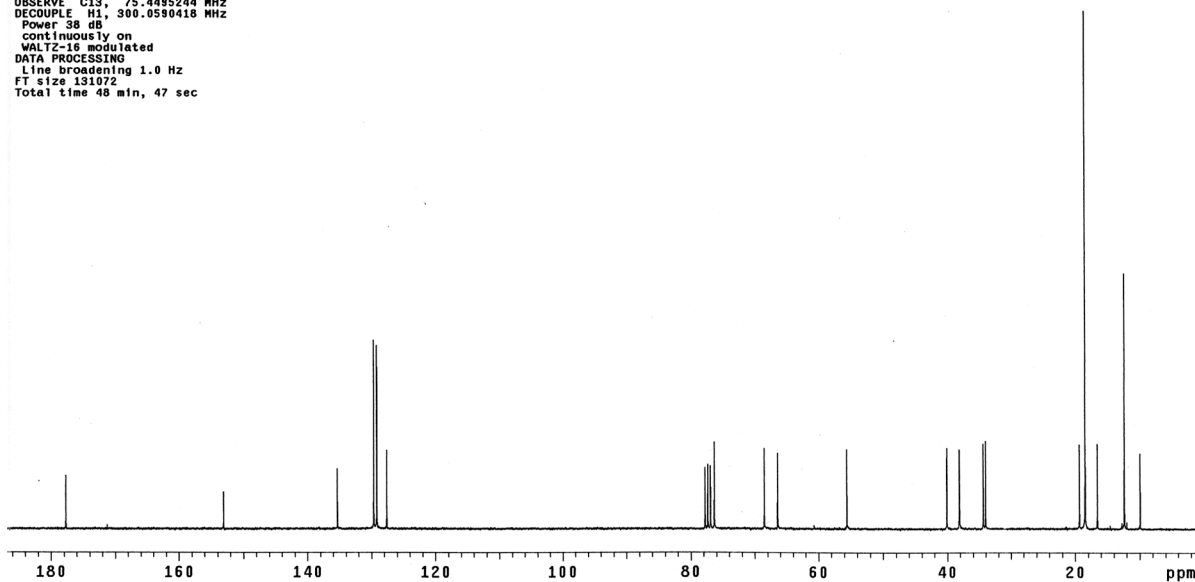

II-23 (diol)

exp1 s2pu1

| SAMPLE             |                 | SPECIAL |          |
|--------------------|-----------------|---------|----------|
| date               | Jul 7 2005      | temp    | not used |
| solvent            | CDCl3           | gain    | not used |
| file               | /data/venkat/~  | spin    | 20       |
| nmr                | sys/date/II-23~ | hst     | 0.008    |
| 07Jul2005-23:22:2~ | pw90            | 9.500   |          |
| 0/PROTON.fid       | alpha           | 20.000  |          |
| ACQUISITION        |                 | FLAGS   |          |
| sw                 | 3601.0          | il      | n        |
| at                 | 1.398           | in      | n        |
| np                 | 14380           | dp      | y        |
| fb                 | 2000            | hs      | nn       |
| bs                 | 16              |         |          |
| ss                 | 2               | fn      | not used |
| d1                 | 5.000           |         |          |
| nt                 | 16              | sp      | -21.1    |
| ct                 | 16              | wp      | 2488.7   |
| tn                 | 300.059         | rfl     | 300.2    |
| sfrq               | 54.2            | rfp     | 0        |
| tof                | 60              | rp      | 120.0    |
| tpwr               | 4.750           | lp      | -41.8    |
| pw                 |                 | vc      | 250      |
| deco               | C13             | sc      | 0        |
| dn                 | 0               | vs      | 389      |
| dof                | nnn             | th      | 43       |
| dm                 | c               | ai      | cdc ph   |
| dmm                | 39              |         |          |
| dpwr               | 12300           |         |          |
| dmf                |                 |         |          |

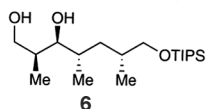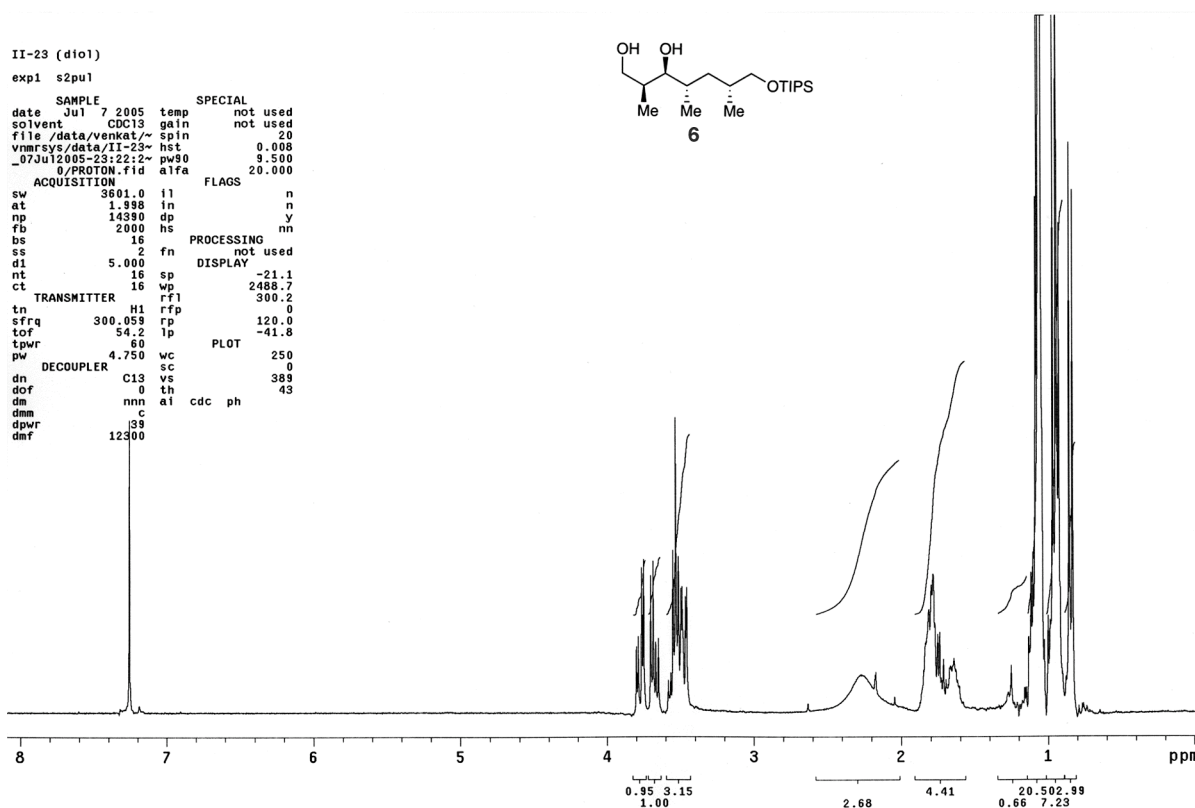

II-23 (diol)

exp1 s2pu1

| SAMPLE               |                 | SPECIAL |          |
|----------------------|-----------------|---------|----------|
| date                 | Jul 7 2005      | temp    | not used |
| solvent              | CDCl3           | gain    | not used |
| file                 | /data/venkat/~  | spin    | 20       |
| nmr                  | sys/date/II-23~ | hst     | 0.008    |
| 07Jul2005-CARBON.fid | pw90            | 7.800   |          |
| 0/PROTON.fid         | alpha           | 20.000  |          |
| ACQUISITION          |                 | FLAGS   |          |
| sw                   | 18867.9         | il      | n        |
| at                   | 1.815           | in      | n        |
| np                   | 68482           | dp      | y        |
| fb                   | 10400           | hs      | nn       |
| bs                   | 64              |         |          |
| ss                   | 2               | lb      | 1.00     |
| d1                   | 1.000           | fn      | not used |
| nt                   | 1000            |         |          |
| ct                   | 324             | sp      | -93.4    |
| tn                   | 75.458          | wp      | 9148.8   |
| sfrq                 | 750.6           | rfl     | 1134.5   |
| tof                  | 58              | rfp     | 0        |
| tpwr                 | 3.900           | rp      | 47.7     |
| pw                   |                 | lp      | -188.1   |
| deco                 | C13             | vc      | 250      |
| dn                   | 0               | sc      | 0        |
| dof                  | yyy             | vs      | 38       |
| dm                   | w               | th      | 23       |
| dmm                  | 38              | ai      | no ph    |
| dpwr                 | 7900            |         |          |
| dmf                  |                 |         |          |

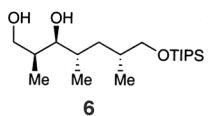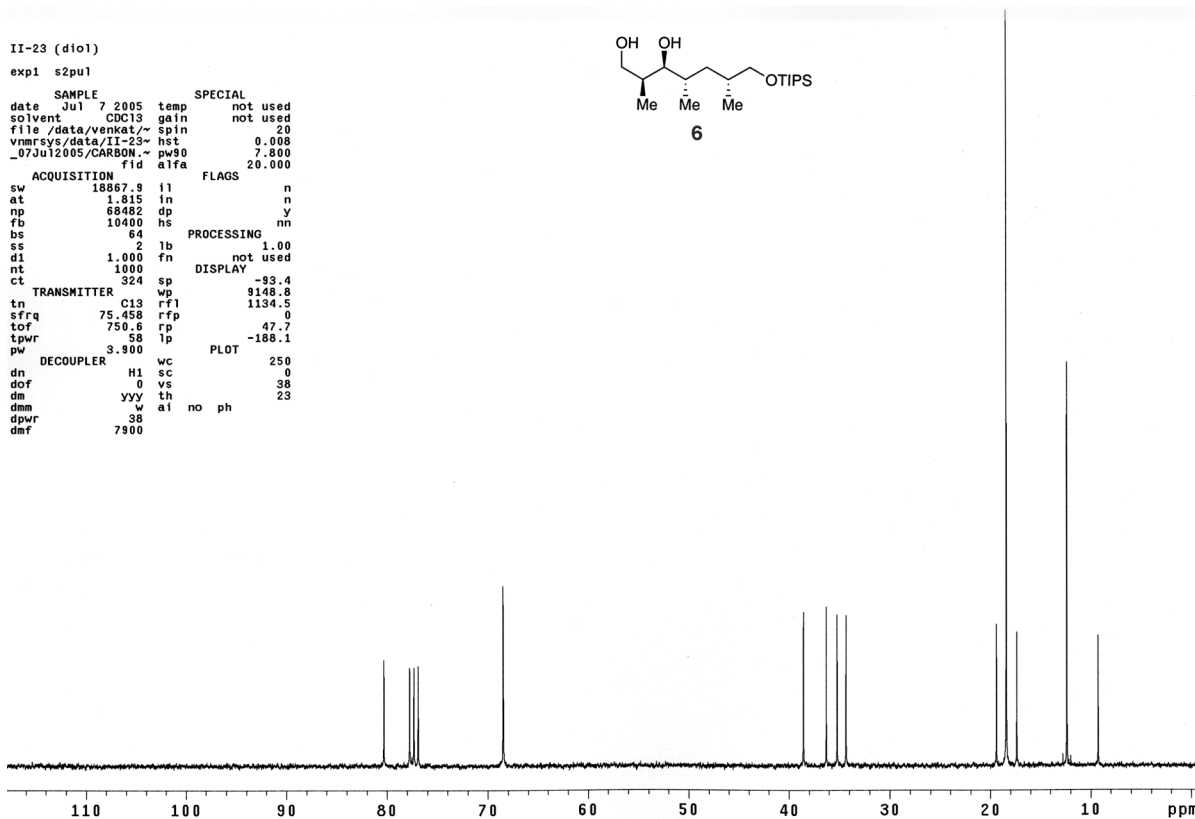

II-25-PMB-acetal

exp1 s2pu1

| SAMPLE      |             | SPECIAL    |          |
|-------------|-------------|------------|----------|
| date        | Mar 30 2005 | temp       | not used |
| solvent     | CDC13       | gain       | not used |
| file        | exp         | spin       | 20       |
| ACQUISITION |             | hst        | 0.008    |
| sw          | 4800.8      | pw90       | 8.500    |
| at          | 1.998       | alpha      | 20.000   |
| np          | 19184       | FLAGS      |          |
| fb          | 2600        | l1         | n        |
| bs          | 16          | in         | n        |
| ss          | 2           | dp         | y        |
| d1          | 5.000       | hs         | nn       |
| nt          | 16          | PROCESSING |          |
| ct          | 16          | fn         | not used |
| TRANSMITTER |             | DISPLAY    |          |
| tn          | H1          | sp         | -38.6    |
| sfrq        | 300.059     | wp         | 2744.0   |
| tof         | 354.2       | rf1        | 600.0    |
| tpwr        | 60          | rfp        | 0        |
| pw          | 4.750       | rp         | 82.1     |
| DECOUPLER   |             | lp         | -44.7    |
| dn          | C13         | PLOT       |          |
| dof         | 0           | wc         | 250      |
| dm          | nnn         | sc         | 0        |
| dmm         | c           | vs         | 184      |
| dpwr        | 39          | th         | 46       |
| dmf         | 12900       | ai         | cdc ph   |

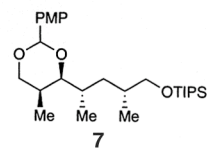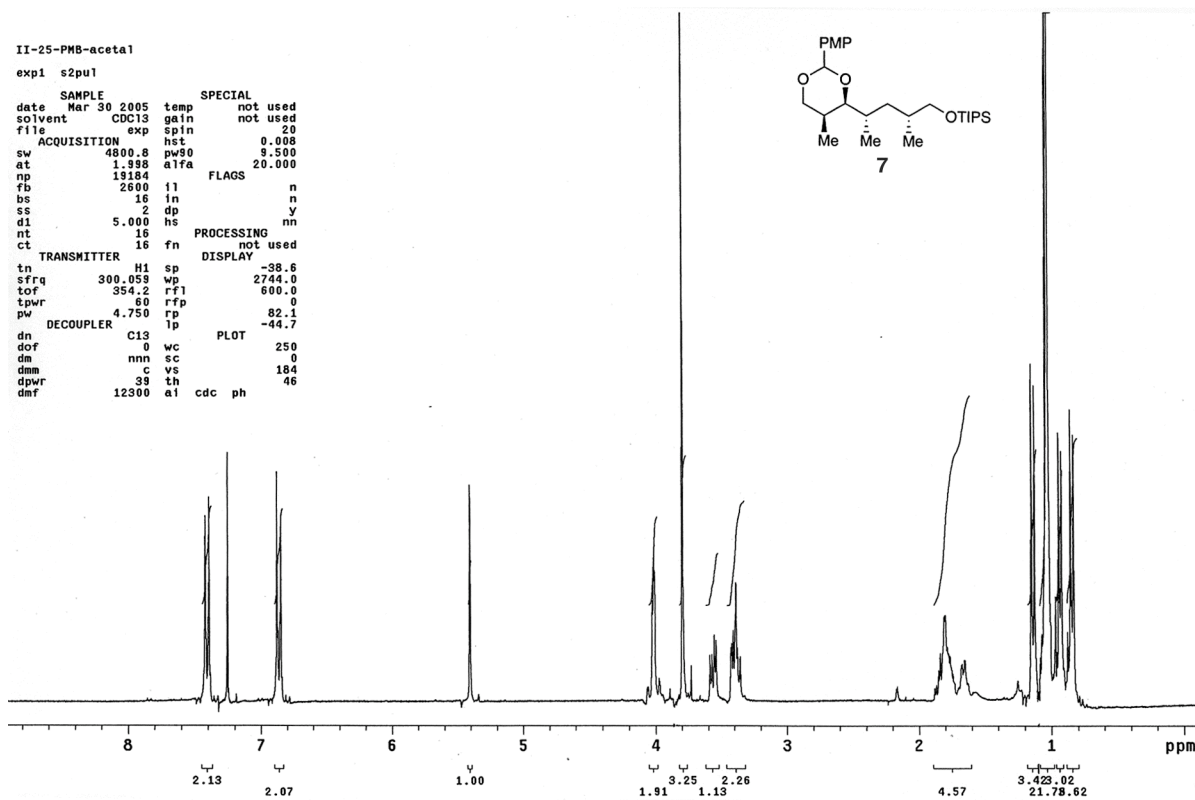

LV-II-42

Archive directory: /data/venkat/vnmrsvs/data  
Sample directory: LV-II-42\_06Jun2005-15:16:49  
File: CARBON

Pulse Sequence: s2pu1  
Solvent: CDC13  
Ambient temperature  
Mercury-300BB "medicinal1"

Relax. delay 1.000 sec  
Pulse 45.0 degrees  
Acq. time 1.815 sec  
Width 18867.9 Hz  
512 repetitions  
OBSERVE C13, 75.4495244 MHz  
DECOUPLE H1, 300.0590418 MHz  
Power 38 dB  
continuously on  
WALTZ-16 modulated  
DATA PROCESSING  
Line broadening 1.0 Hz  
FT size 131072  
Total time 25 min, 5 sec

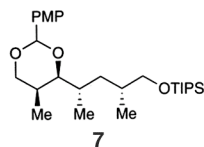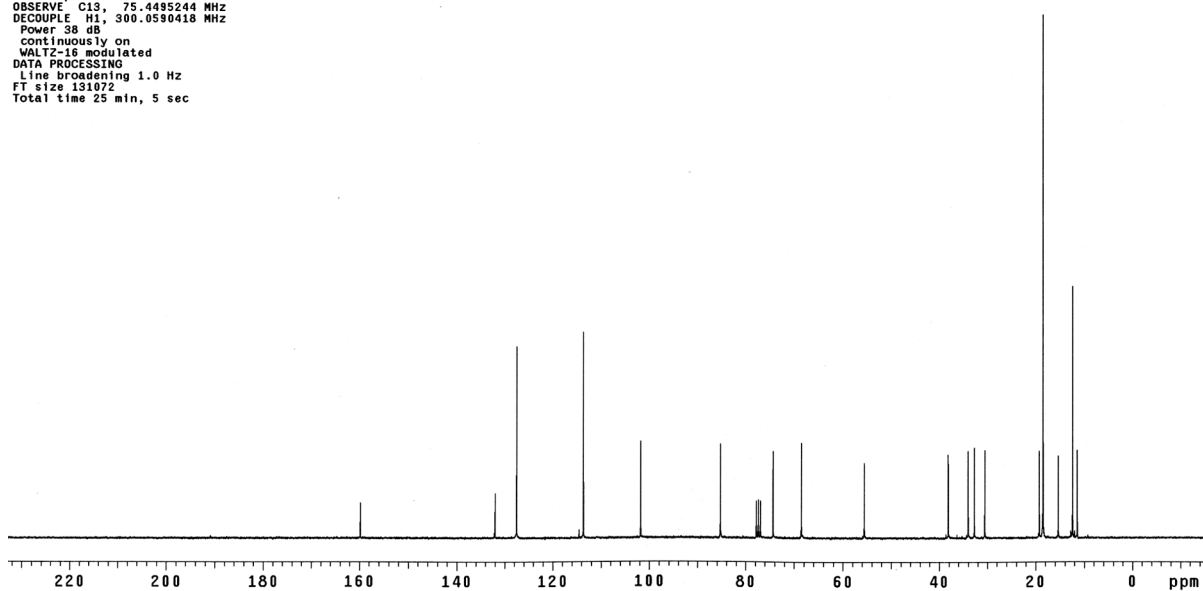



LV-II-48-recoverd R-CHO

Archive directory: /data/venkat/vnmrsys/data  
Sample directory: II-48SM\_11Jun2005

Pulse Sequence: s2pu1  
Solvent: CDCl3  
Ambient temperature  
File: PROTON  
Mercury-300BB "medicina12"

Relax. delay 5.000 sec  
Pulse 45.0 degrees  
Acq. time 1.998 sec  
Width 4800.8 Hz  
16 repetitions  
OBSERVE H1, 300.0575957 MHz  
DATA PROCESSING  
FT size 32768  
Total time 2 min, 10 sec

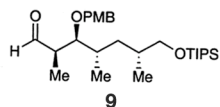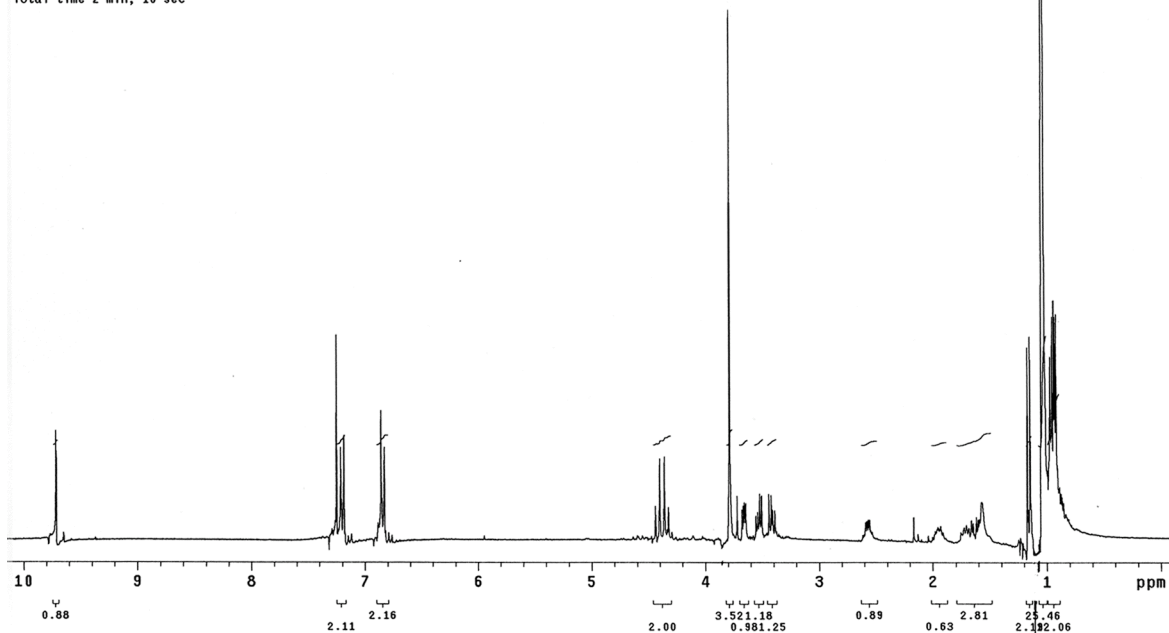

LV-II-48-recovered R-CHO

Archive directory: /data/venkat/vnmrsys/data  
Sample directory: II-48SM\_11Jun2005-10:51:54  
File: CARBON

Pulse Sequence: s2pu1  
Solvent: CDCl3  
Ambient temperature  
Mercury-300BB "medicina11"

Relax. delay 1.000 sec  
Pulse 45.0 degrees  
Acq. time 1.815 sec  
Width 18867.9 Hz  
512 repetitions  
OBSERVE C13, 75.4495244 MHz  
DECOUPLE H1, 300.0590418 MHz  
Power 38 dB  
continuously on  
WALTZ-16 modulated  
DATA PROCESSING  
Line broadening 1.0 Hz  
FT size 131072  
Total time 25 min, 5 sec

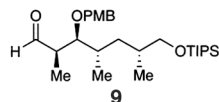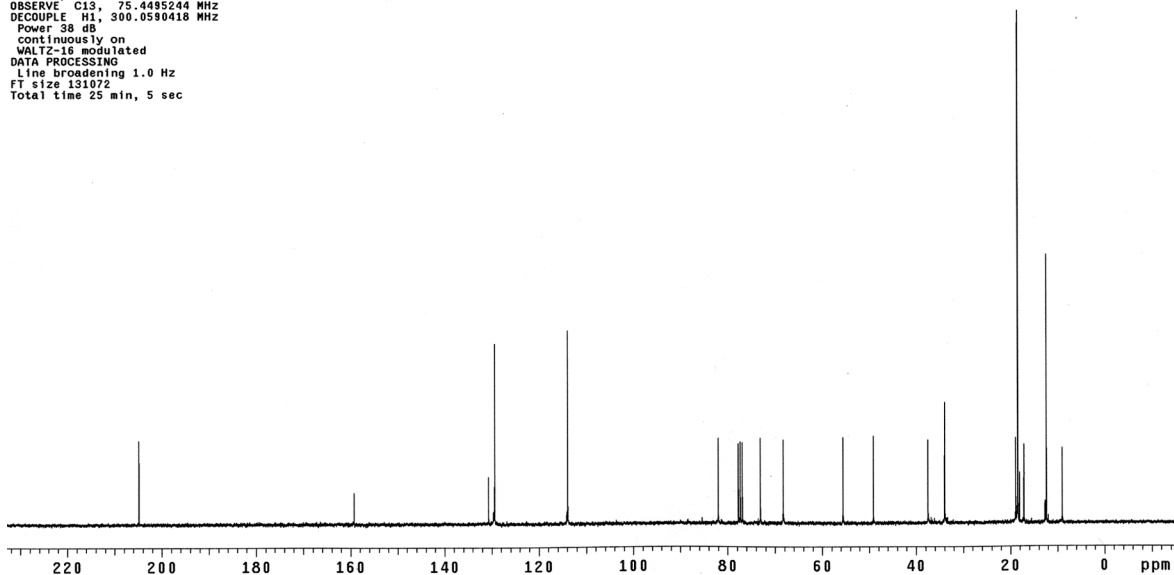



LV-II-48-aldo1

Archive directory: /data/venkat/vnmrsvs/data  
Sample directory: LV-II-48\_12Jun2005

Pulse Sequence: s2pu1  
Solvent: CDCl3  
Ambient temperature  
File: PROTON  
Mercury-300SS "medicinal2"

Relax. delay 5.000 sec  
Pulse 45.0 degrees  
Acq. time 1.998 sec  
Width 4800.8 Hz  
16 repetitions  
OBSERVE H1, 300.0575957 MHz  
DATA PROCESSING  
FT size 32768  
Total time 2 min, 10 sec

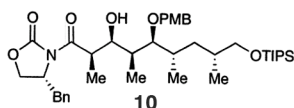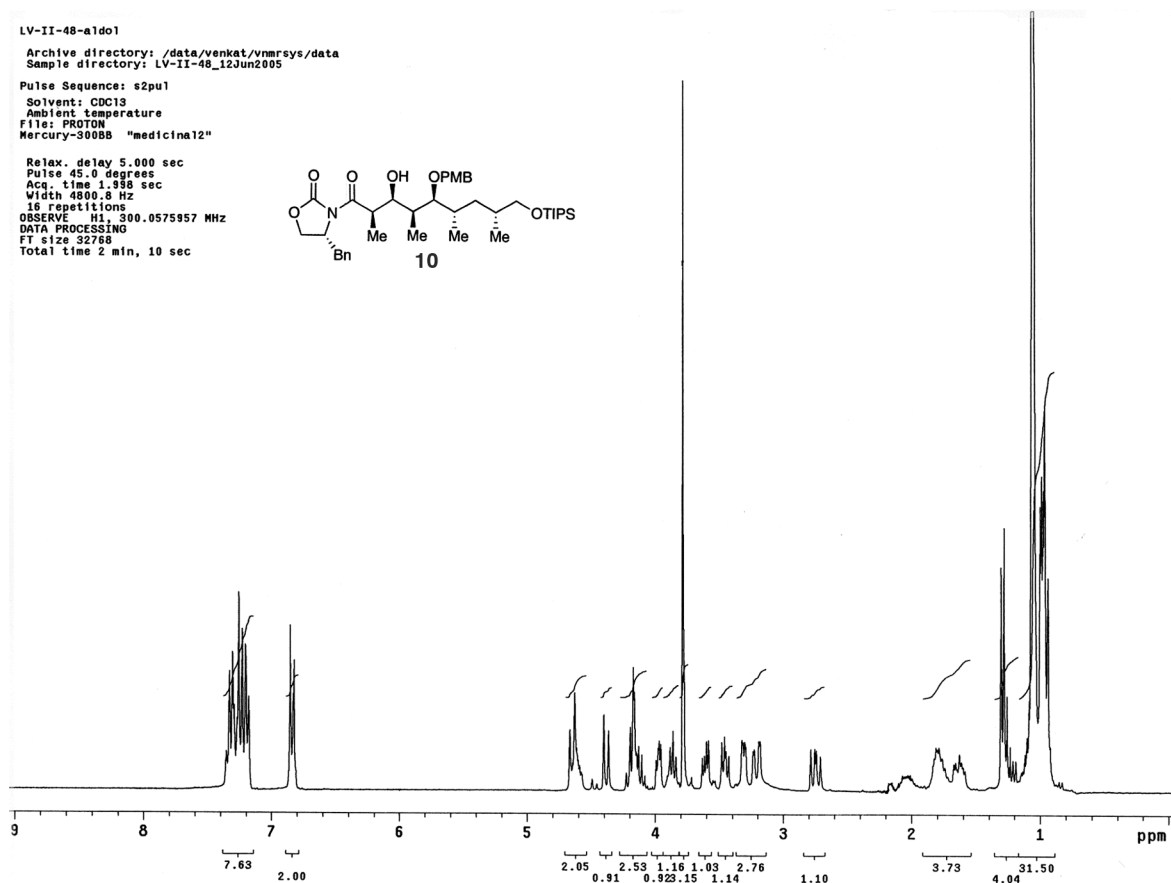

LV-II-48-aldo1

exp1 s2pu1

| SAMPLE      |             | SPECIAL    |          |
|-------------|-------------|------------|----------|
| date        | Jun 12 2005 | temp       | not used |
| solvent     | CDCl3       | gain       | not used |
| file        | exp         | spin       | 20       |
| ACQUISITION |             | hst        |          |
| sw          | 18867.3     | hst        | 0.008    |
| et          | 1.815       | pw90       | 7.800    |
| np          | 68482       | at1a       | 20.000   |
| fb          | 10400       | FLAGS      |          |
| bs          | 64          | l1         | n        |
| ss          | 2           | dp         | y        |
| d1          | 1.000       | hs         | nn       |
| nt          | 512         | PROCESSING |          |
| ct          | 192         | lb         | 1.00     |
| tn          | C13         | fn         | not used |
| sfrq        | 75.458      | DISPLAY    |          |
| tof         | 750.6       | sp         | 501.7    |
| tpwr        | 58          | wp         | 13239.6  |
| pw          | 3.900       | rf1        | 1134.5   |
| deco        |             | rfp        | 0        |
| dn          | H1          | rp         | 63.2     |
| dof         | 0           | lp         | -221.6   |
| dm          | yy          | PLOT       |          |
| dmm         | w           | wc         | 250      |
| dpwr        | 38          | vs         | 0        |
| dmf         | 7900        | th         | 200      |
|             |             | nm         | 20       |
|             |             | no         | ph       |

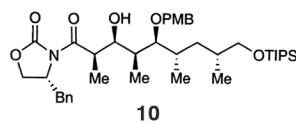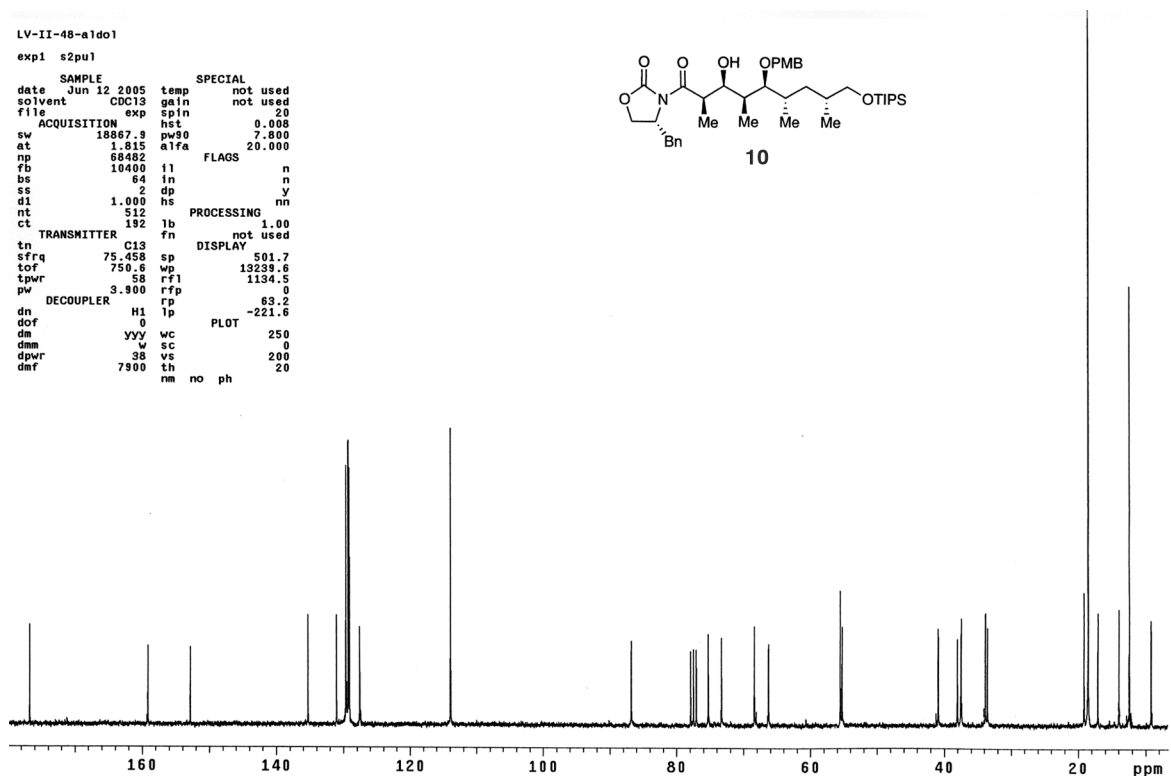

II-69-p?

exp1 s2pu1

SAMPLE  
date Jul 16 2005 temp not used  
solvent CDC13 gain not used  
file /data/venkat/~ spin 20  
vmrsvs/data/II-69~ hst 0.008  
-P\_16Jul2005/PROTO~ pw80 9.500  
N.fid a1fa 20.000

ACQUISITION  
sw 4800.8 i1 n  
at 1.988 in n  
np 19184 dp y  
fb 2600 hs nn  
bs 16  
ss 2 fn not used  
d1 5.000  
nt 16 sp  
ct 16 wp 2554.7

TRANSMITTER  
tn H1 rfp 600.0  
sfrq 300.059 rp 146.1  
tof 354.2 lp -50.9  
tpwr 60  
pw 4.750 wc 250  
decooupler C13 vs 254  
dn 0 th 43  
dm nm al cdd ph  
dmm c  
dpwr 39  
dmf 12300

PROCESSING  
DISPLAY -19.8  
PLOT 250  
0  
43

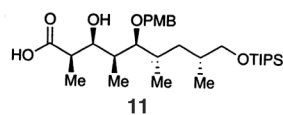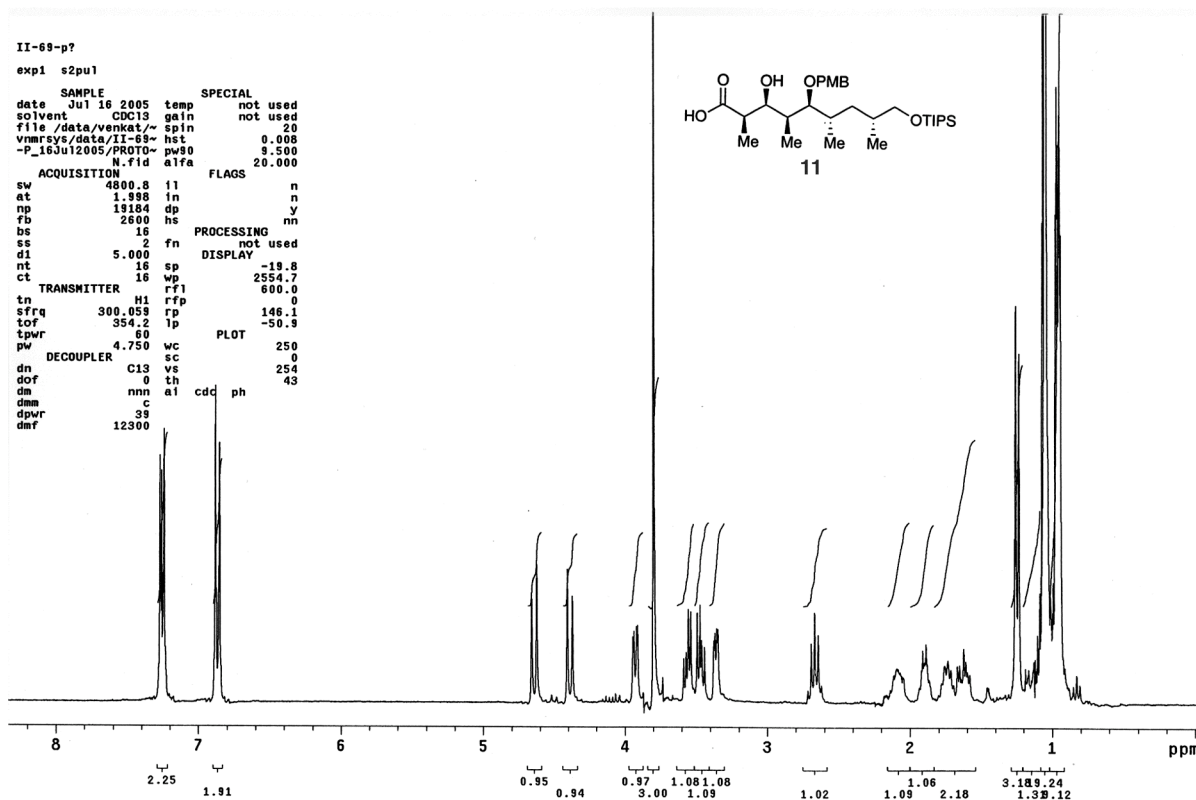

II-69-p?

exp1 s2pu1

SAMPLE  
date Jul 16 2005 temp not used  
solvent CDC13 gain not used  
file exp spin 20  
ACQUISITION hst 0.008  
18867.9 pw80 9.500  
at 1.815 a1fa 20.000

ACQUISITION  
sw 18867.9 i1 n  
at 1.815 in n  
np 68482 dp y  
fb 10400 hs nn  
bs 64  
ss 2  
d1 1.000  
nt 1000  
ct 704

TRANSMITTER  
tn C13  
sfrq 75.458 sp  
tof 750.6 wp 17405.1  
tpwr 58 rfp 1134.5  
pw 3.900 rp 49.8  
decooupler H1 lp -213.6  
dn 0  
dm yy  
dmm vs  
dpwr 38  
dmf 7900 th 14  
nm no ph

PROCESSING  
DISPLAY -837.1  
PLOT 250  
0  
288  
14

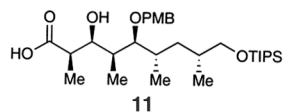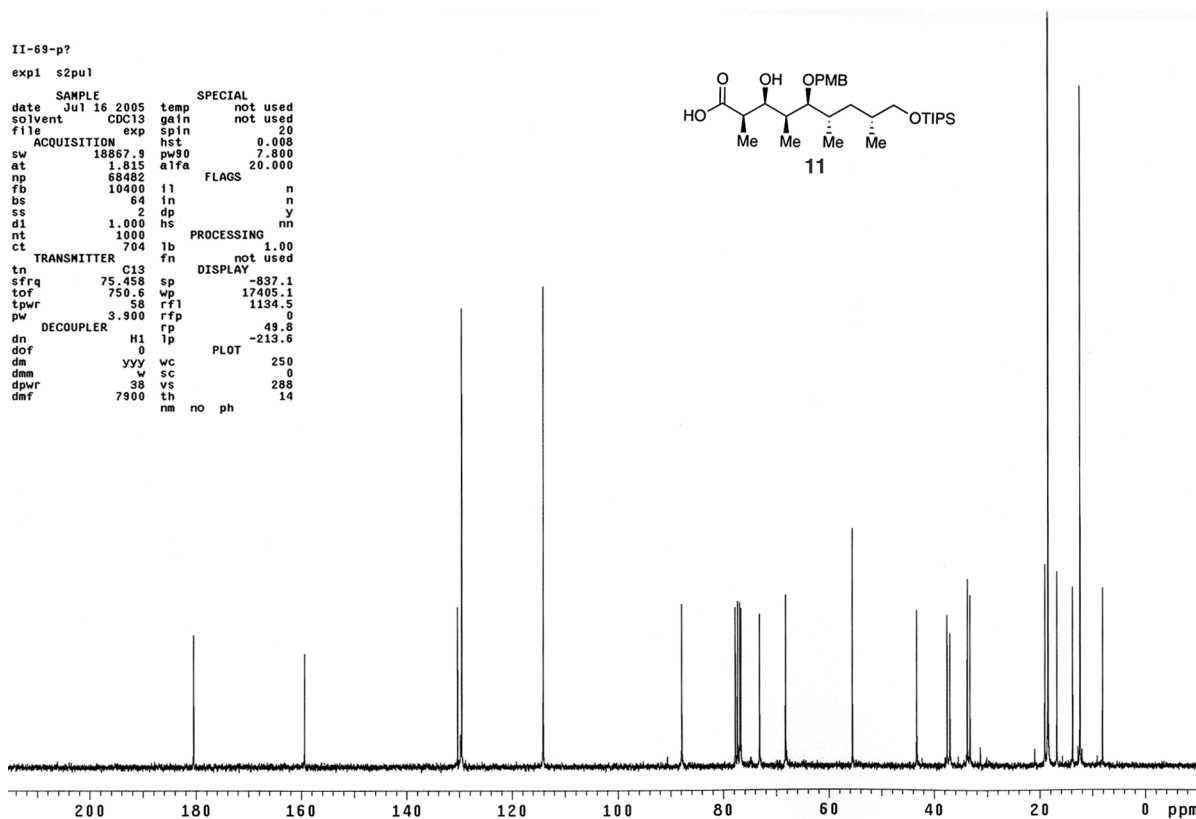

LV-II-52-F2

Archive directory: /data/venkat/vnmrsys/data  
Sample directory: II-52-F2\_16Jun2005

Pulse Sequence: s2pu1

Solvent: CDCl3

Ambient temperature

File: PROTON

Mercury-300BB "medicinal2"

Relax. delay 5.000 sec  
Pulse 45.0 degrees  
Acq. time 1.988 sec  
Width 4800.8 Hz  
16 repetitions  
OBSERVE H1, 300.0575957 MHz  
DATA PROCESSING  
FT size 32768  
Total time 2 min, 10 sec

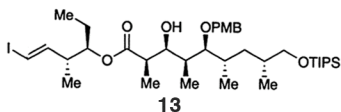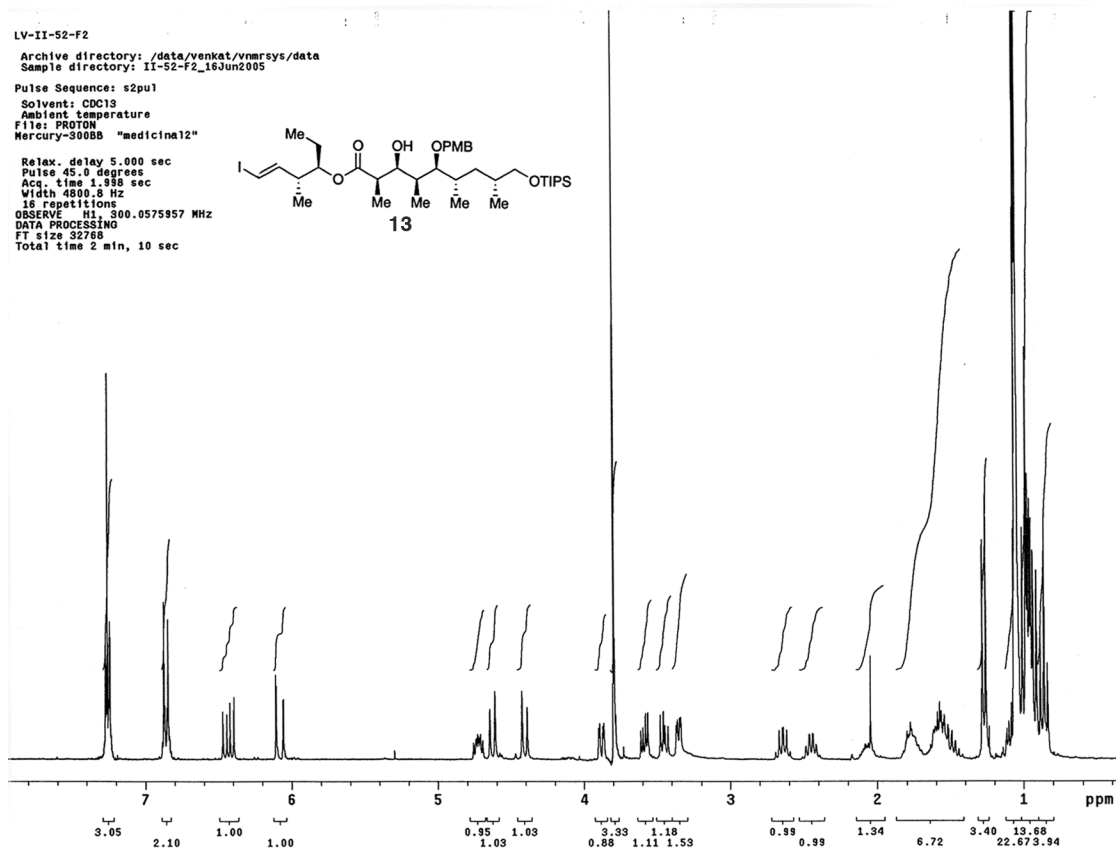

LV-II-52-F2

Archive directory: /data/venkat/vnmrsys/data  
Sample directory: II-52-F2\_16Jun2005

Pulse Sequence: s2pu1

Solvent: CDCl3

Ambient temperature

File: CARBON

Mercury-300BB "medicinal2"

Relax. delay 1.000 sec  
Pulse 45.0 degrees  
Acq. time 1.815 sec  
Width 18867.9 Hz  
512 repetitions  
OBSERVE C13, 75.4495244 MHz  
DECOUPLE H1, 300.0590418 MHz  
Power 38 dB  
continuously on  
WALTZ-16 modulated  
DATA PROCESSING  
Line broadening 1.0 Hz  
FT size 131072  
Total time 25 min, 5 sec

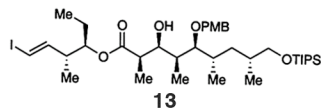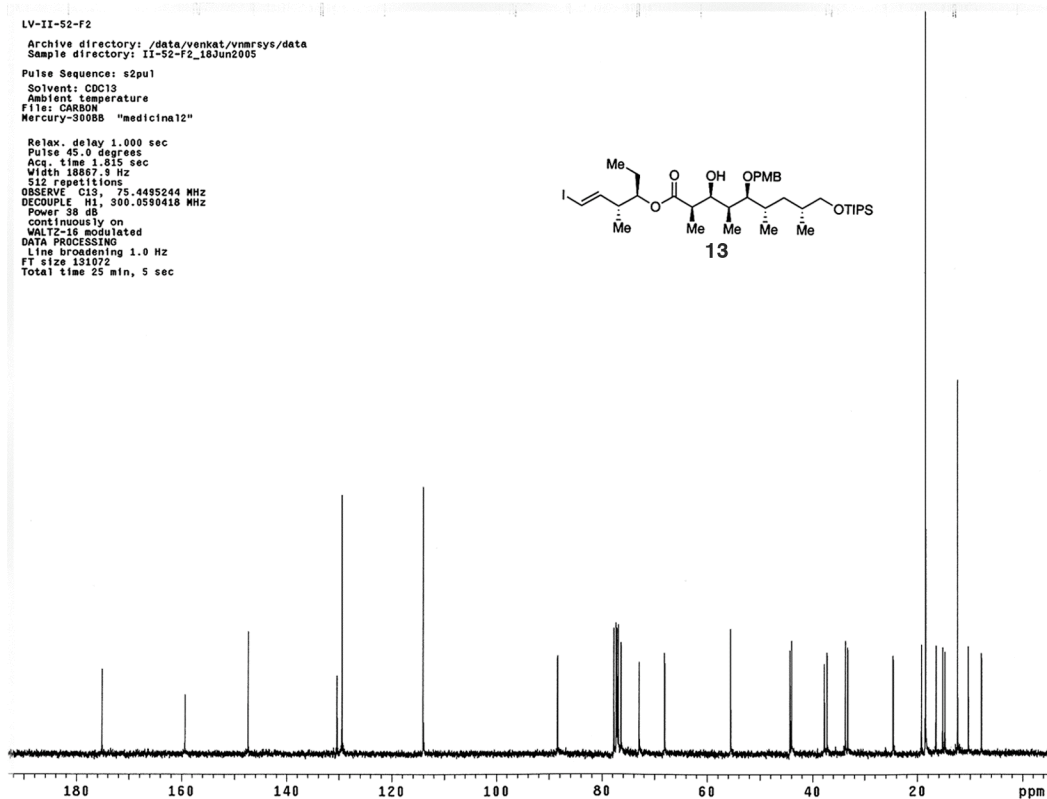



LV-II-76 (aldehyde)

Archive directory: /data/venkat/vnmrsys/data  
Sample directory: II-76\_26Jul2005

Pulse Sequence: s2pu1  
Solvent: CDC13  
Ambient temperature  
File: PROTON  
Mercury-300BB "medicinal2"

Relax. delay 5.000 sec  
Pulse 45.0 degrees  
Acq. time 1.998 sec  
Width 4800.6 Hz  
16 repetitions  
OBSERVE H1, 300.0575957 MHz  
DATA PROCESSING  
FT size 32768  
Total time 2 min, 10 sec

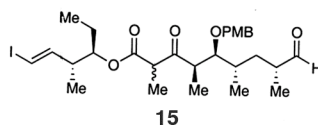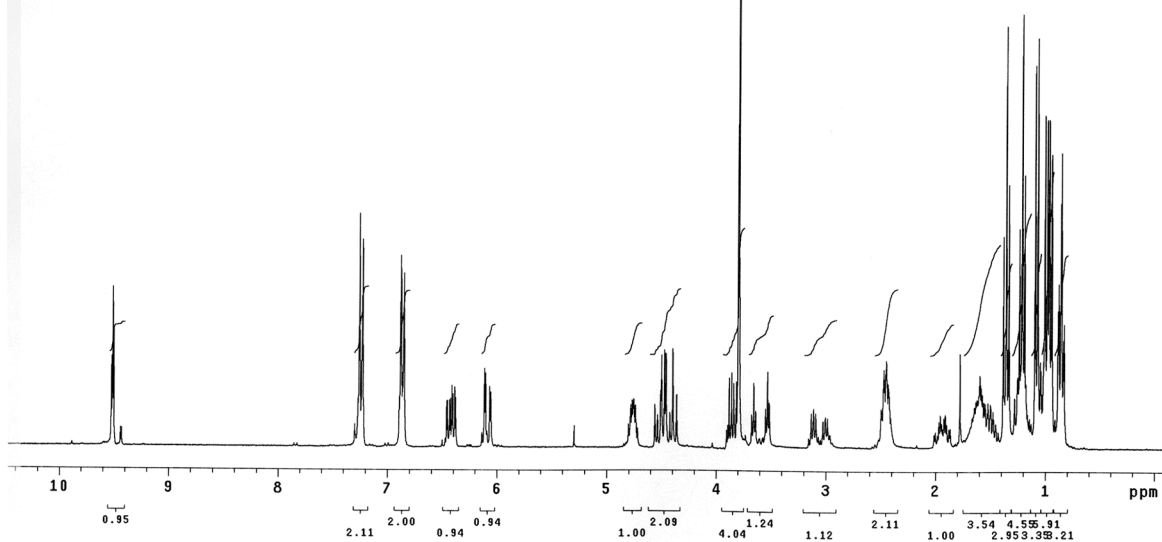

LV-II-58 (aldehyde)

Archive directory: /data/venkat/vnmrsys/data  
Sample directory: II-58\_26Jun2005  
File: CARBON

Pulse Sequence: s2pu1  
Solvent: CDC13  
Ambient temperature  
Mercury-300BB "medicinal1"

Relax. delay 1.000 sec  
Pulse 45.0 degrees  
Acq. time 1.815 sec  
Width 18667.9 Hz  
261 repetitions  
OBSERVE C13, 75.4495244 MHz  
DECOUPLE H1, 300.0530418 MHz  
Power 38 dB  
continuously on  
WALTZ-16 modulated  
DATA PROCESSING  
Line broadening 1.0 Hz  
FT size 131072  
Total time 48 min, 47 sec

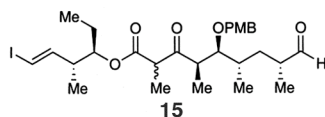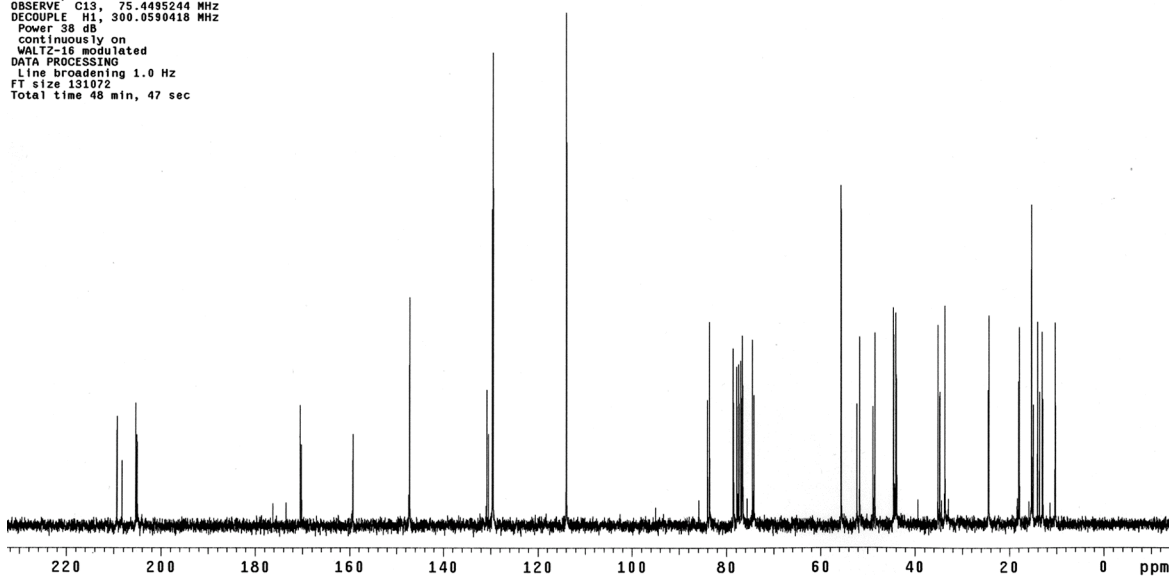

LV-II-59-F1 (NHK)

exp1 s2pu1

| SAMPLE      |             | SPECIAL    |          |
|-------------|-------------|------------|----------|
| date        | Jun 27 2005 | temp       | not used |
| solvent     | CDCl3       | gain       | not used |
| file        | exp         | spin       | 20       |
| ACQUISITION |             | hst        | 0.008    |
| sw          | 4800.8      | pw90       | 9.500    |
| at          | 1.988       | alpha      | 20.000   |
| np          | 19184       | FLAGS      |          |
| fb          | 2600        | ll         | n        |
| bs          | 16          | in         | n        |
| ss          | 2           | dp         | y        |
| d1          | 5.000       | hs         | nn       |
| nt          | 16          | PROCESSING | not used |
| ct          | 16          | fn         |          |
| TRANSMITTER |             | DISPLAY    |          |
| tn          | H1          | sp         | -0.8     |
| sfrq        | 300.059     | wp         | 2397.0   |
| tof         | 354.2       | rfl        | 600.0    |
| tpwr        | 60          | rpf        | 0        |
| pw          | 4.750       | rp         | 118.6    |
| DECOUPLER   |             | lp         | -57.4    |
| dn          | C13         | PLOT       |          |
| dof         | 0           | wc         | 250      |
| dm          | nmn         | sc         | 0        |
| dmm         | c           | vs         | 113      |
| dpwr        | 39          | th         | 46       |
| dmf         | 12300       | ai         | cdc ph   |

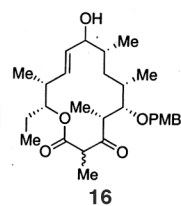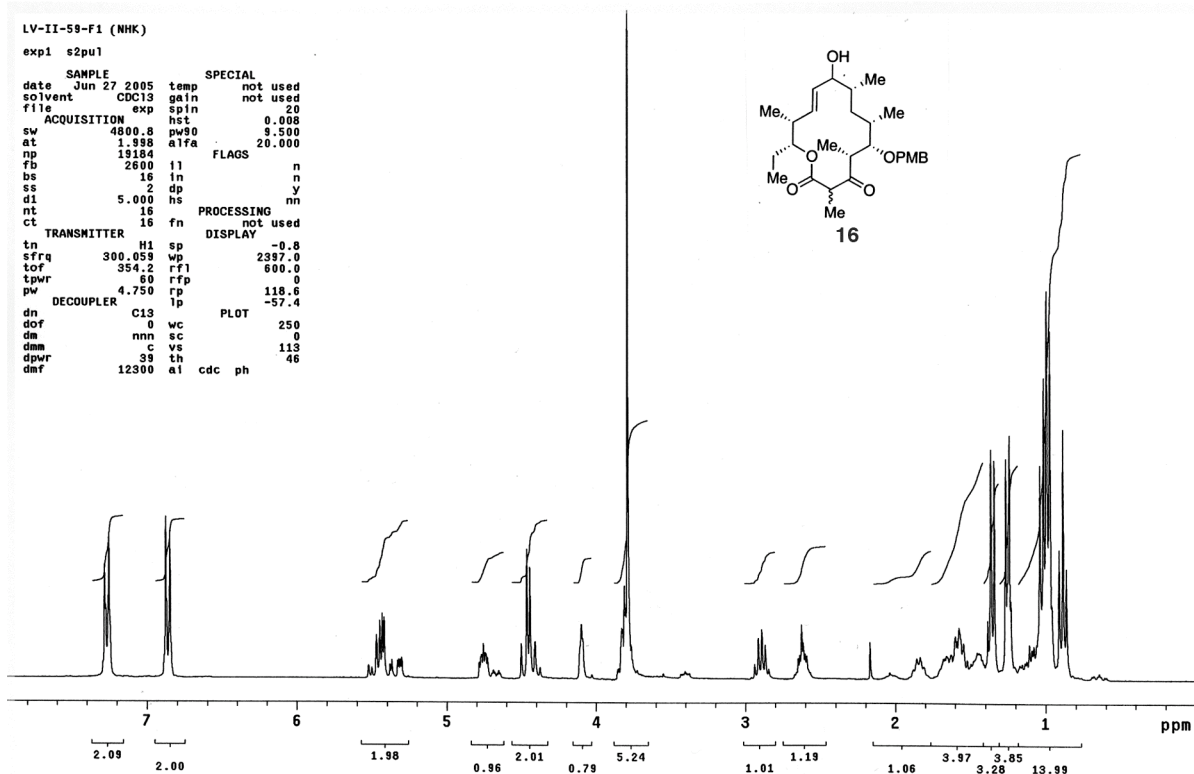

LV-II-59-F1 (NHK)

Archive directory: /data/venkat/vnmrsys/data  
Sample directory: LV-II-59-F1\_27Jun2005  
File: CARBON

Pulse Sequence: s2pu1

Solvent: CDCl3  
Ambient temperature  
Mercury-300BB "medicinal1"

Relax. delay 1.000 sec  
Pulse 45.0 degrees  
Acq. time 1.815 sec  
Width 18867.9 Hz  
1139 repetitions  
OBSERVE C13, 75.4495244 MHz  
DECOUPLE H1, 300.0590418 MHz  
Power 38 dB  
continuously on  
WALTZ-16 modulated  
DATA PROCESSING  
Line broadening 1.0 Hz  
FT size 131072  
Total time 1 hr, 37 min, 21 sec

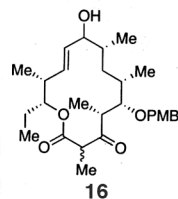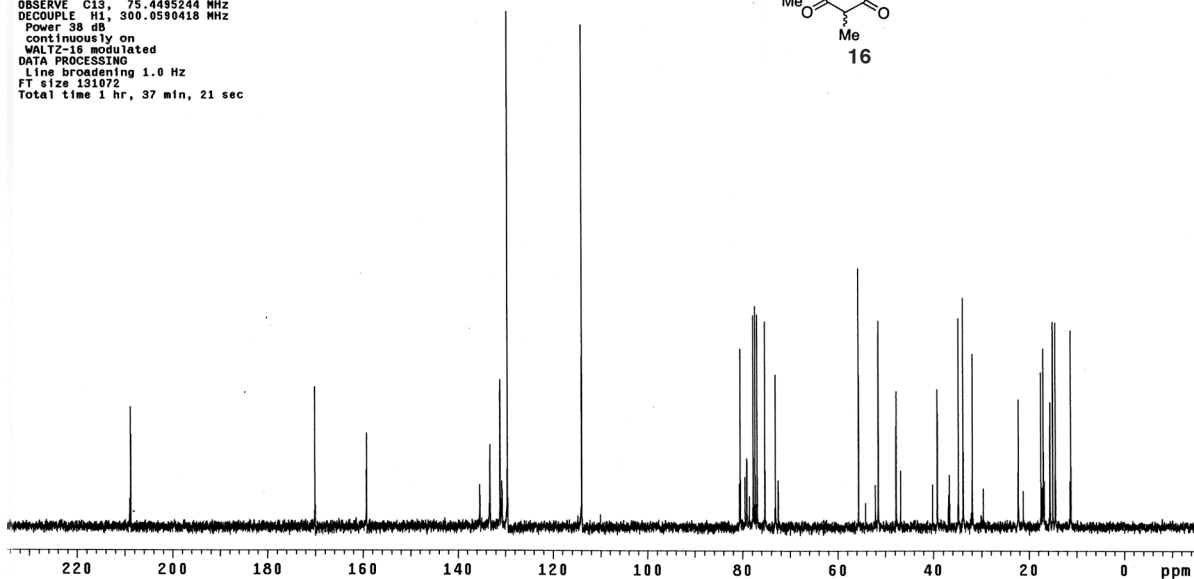

LV-II-64 (Dess-Martin)

Archive directory: /data/venkat/vnmrsys/data  
Sample directory: II-64\_01Jul2005

Pulse Sequence: s2pul1

Solvent: CDCl<sub>3</sub>

Ambient temperature

File: PROTON

Mercury-300BB "medicina12"

Relax. delay 5.000 sec

Pulse 45.0 degrees

Acq. time 1.998 sec

Width 4800.8 Hz

16 repetitions

OBSERVE H1, 300.0575957 MHz

DATA PROCESSING

FT size 32768

Total time 2 min, 10 sec

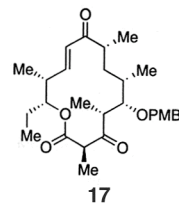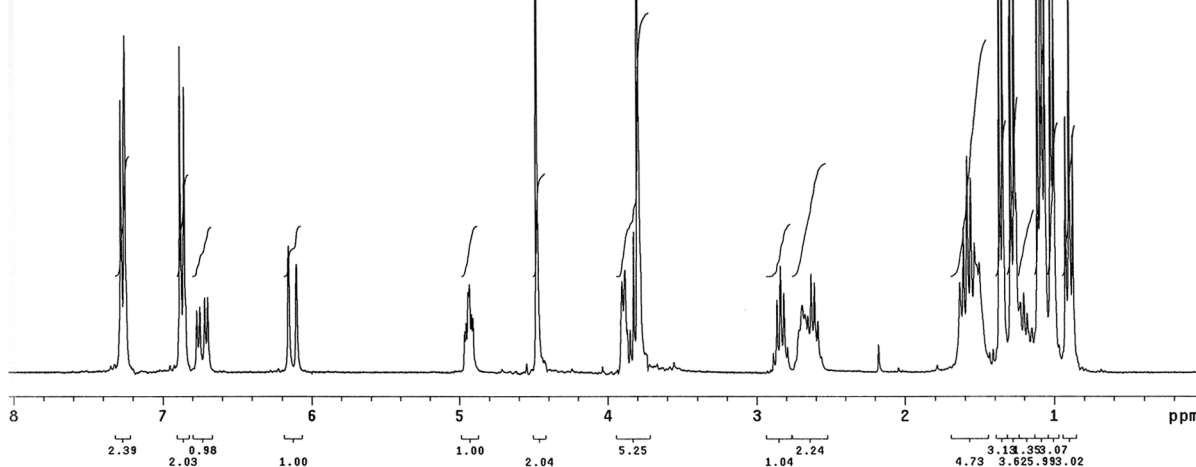

LV-II-64

Archive directory: /data/venkat/vnmrsys/data  
Sample directory: II-64\_01Jul2005-20:26:04

Pulse Sequence: s2pul1

Solvent: CDCl<sub>3</sub>

Ambient temperature

File: CARBON

Mercury-300BB "medicina12"

Relax. delay 1.000 sec

Pulse 45.0 degrees

Acq. time 1.815 sec

Width 18867.9 Hz

2000 repetitions

OBSERVE C13, 75.4485244 MHz

DECOUPLE H1, 300.0590418 MHz

Power 38 dB

continuously on

WALTZ-16 modulated

DATA PROCESSING

Line broadening 1.0 Hz

FT size 131072

Total time 1 hr, 37 min, 21 sec

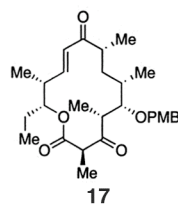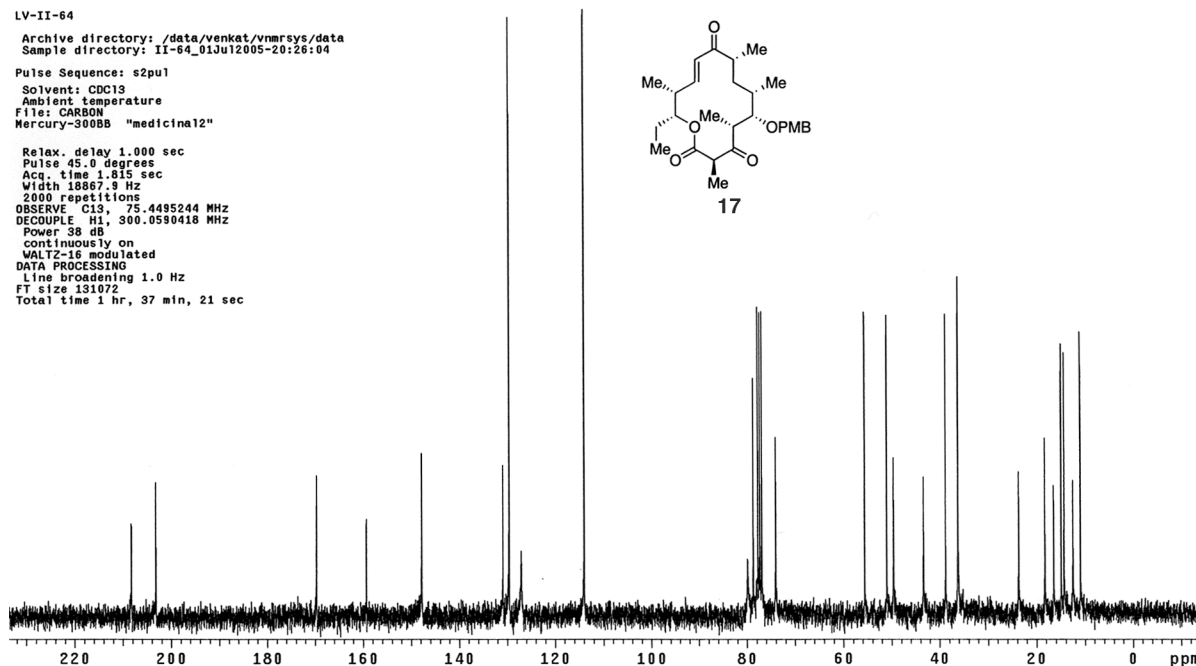

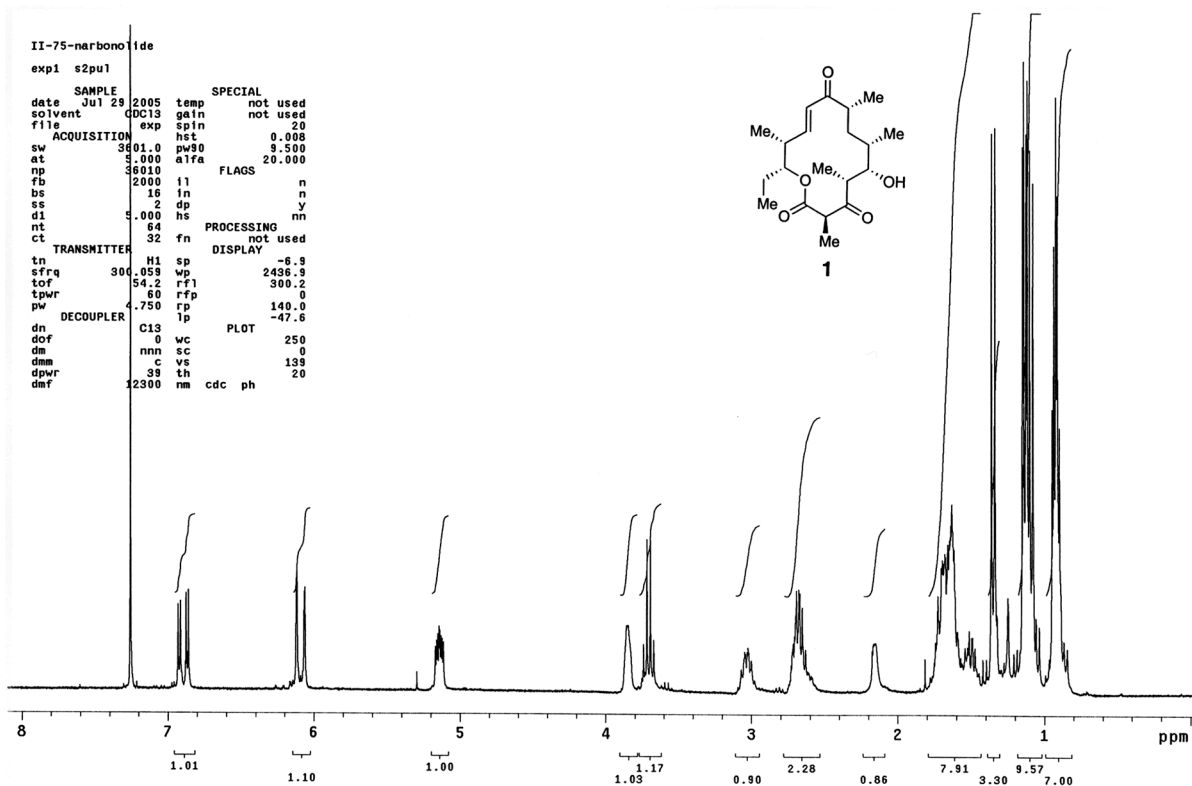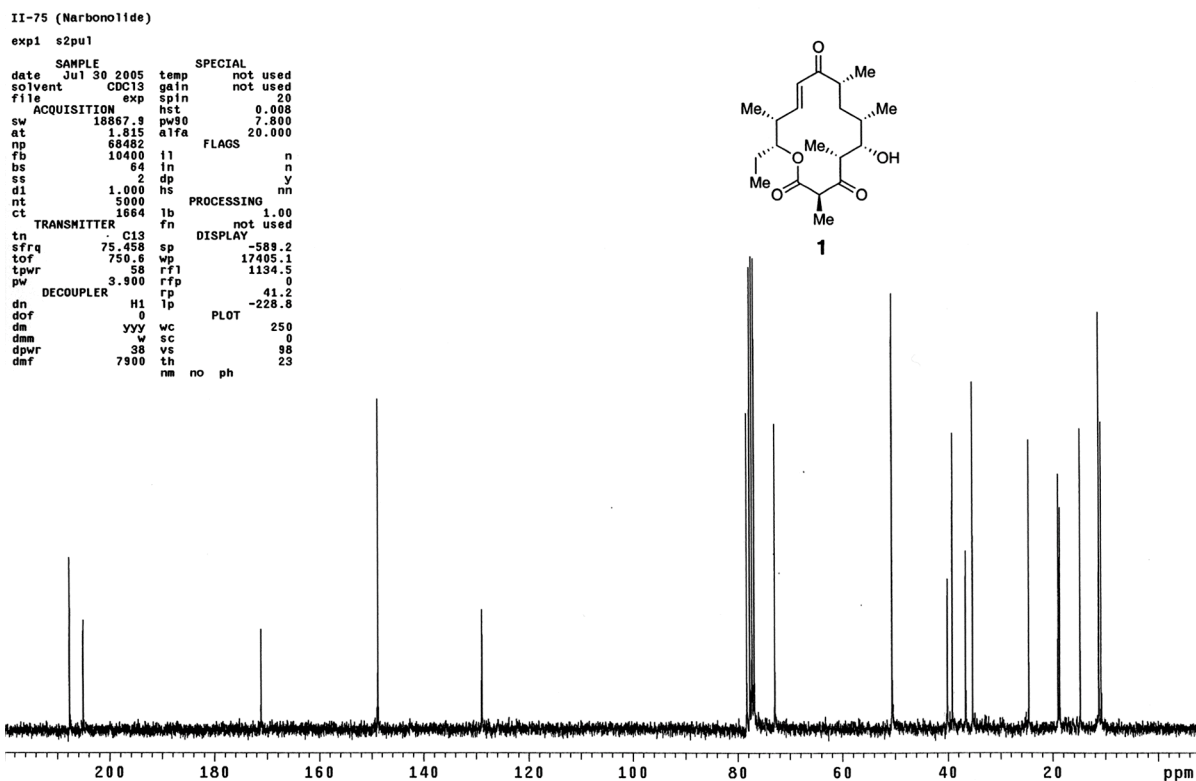



exp1 s2pu1

| SAMPLE           |              |      | SPECIAL |            |          |
|------------------|--------------|------|---------|------------|----------|
| date             | Jun 29 2005  | temp | not     | used       |          |
| solvent          | CDCl3        | gain | not     | used       |          |
| 1h1w             | data/v1-1    | spin |         |            |          |
| vmr/sr           | data/IT-1-61 | hst  |         |            | 0.008    |
| 29Jun2005/PROTON |              | pw90 |         |            | 9.500    |
|                  |              |      |         |            | 20.000   |
| ACQUISITION      |              |      | FLAGS   |            |          |
| acq              | 4800.8       | 11   | n       |            |          |
| nt               | 1            | 1898 | 1n      | n          |          |
| wp               | 118184       | dp   |         | n          |          |
| ss               | 2680         | hs   |         | nn         |          |
| bs               | 16           |      |         |            |          |
| se               |              | 2    | fn      | PROCESSING | not used |
| nt               | 5.001        | sp   |         | DISPLAY    |          |
| ct               | 16           | fp   |         |            | 30.6     |
|                  |              | wp   |         |            | 3229.8   |
| TRANSMITTER      |              | rf   |         |            | 600.0    |
| tn               | H1           | rfp  |         |            | 0        |
| srfrq            | 300.005      | rfp  |         |            | 120.0    |
| tofr             | 354.2        | pc   |         |            | -54.6    |
| tpwr             |              | pc   | PLOT    |            |          |
| pw               | 4.750        | wp   |         |            | 250      |
| DECOUPLER        |              | cl   |         |            |          |
| dn               | C13          | vs   |         |            | 182      |
| do               | 0            | th   |         |            | 43       |
| nm               | nm           | ai   | cdc     | ph         |          |
| dmm              |              |      |         |            |          |
| dpwr             |              |      |         |            |          |
| snr              | 12300        |      |         |            |          |

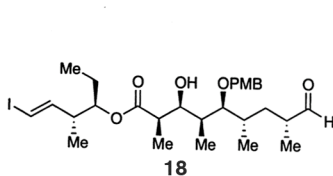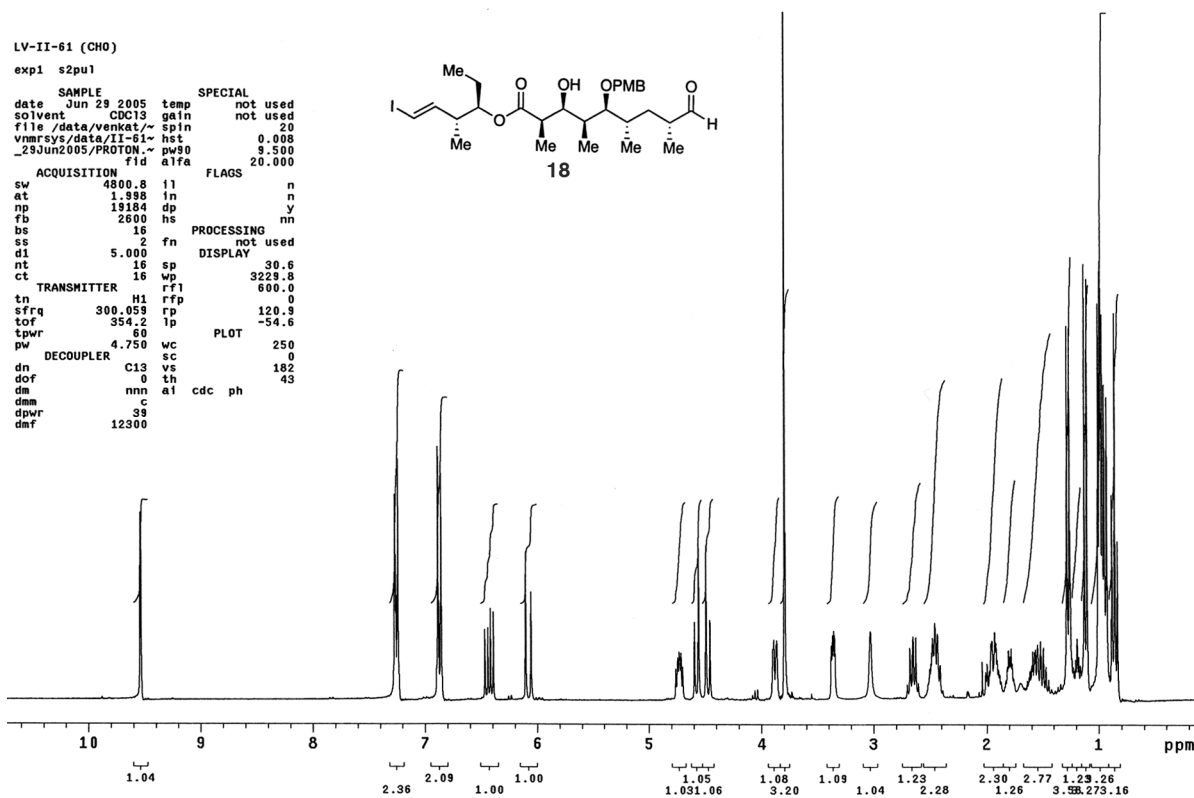

exp1 s2pu1

| SAMPLE             |               |      | SPECIAL |      |          |
|--------------------|---------------|------|---------|------|----------|
| date               | Jun 29 2005   | temp | not     | used |          |
| solvent            | CDCl3         | gain | not     | used |          |
| file               | data/venkat/h | spin |         |      | 20       |
| nmrasy             | data/13c      | hst  |         |      | 0.008    |
| _29Jun2005/CARBON- |               | pw90 |         |      | 7.800    |
|                    | file          | aida |         |      | 20.000   |
| ACQUISITION        |               |      | FLAGS   |      |          |
| sw                 | 1867.9        | f1   |         |      | n        |
| at                 | 1.815         | in   |         |      | n        |
| np                 | 68462         | ds   |         |      | y        |
| bs                 |               | hs   |         |      | m        |
| np                 | 64            |      |         |      |          |
| ss                 |               | 2    | lb      |      | 1.00     |
| nt                 | 1.000         | f    | fn      |      | not used |
| st                 | 512           |      |         |      | DISPLAY  |
| ct                 | 512           |      |         |      | -539.7   |
| tn                 |               | sp   |         |      | 17256.2  |
| TRANSMITTER        |               |      | C13     |      |          |
| sfreq              | 75.458        | r    | rp      |      | 1134.5   |
| tofr               | 750.8         | r    | rp      |      | 49.5     |
| tepr               |               | l    | lp      |      | -235.4   |
| pw                 | 3.900         |      |         |      | PLOT     |
| DECOUPLER          |               |      | wc      |      |          |
| do                 |               | h    | sc      |      | 250      |
| df                 |               | 0    | vs      |      | 50       |
| dm                 | yyy           |      | th      |      | 150      |
| dmf                | w             | ai   |         | no   | ph       |
| dpr                | 38            |      |         |      |          |
| dmm                | 7900          |      |         |      |          |

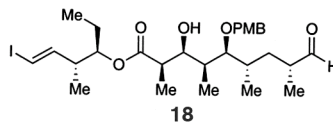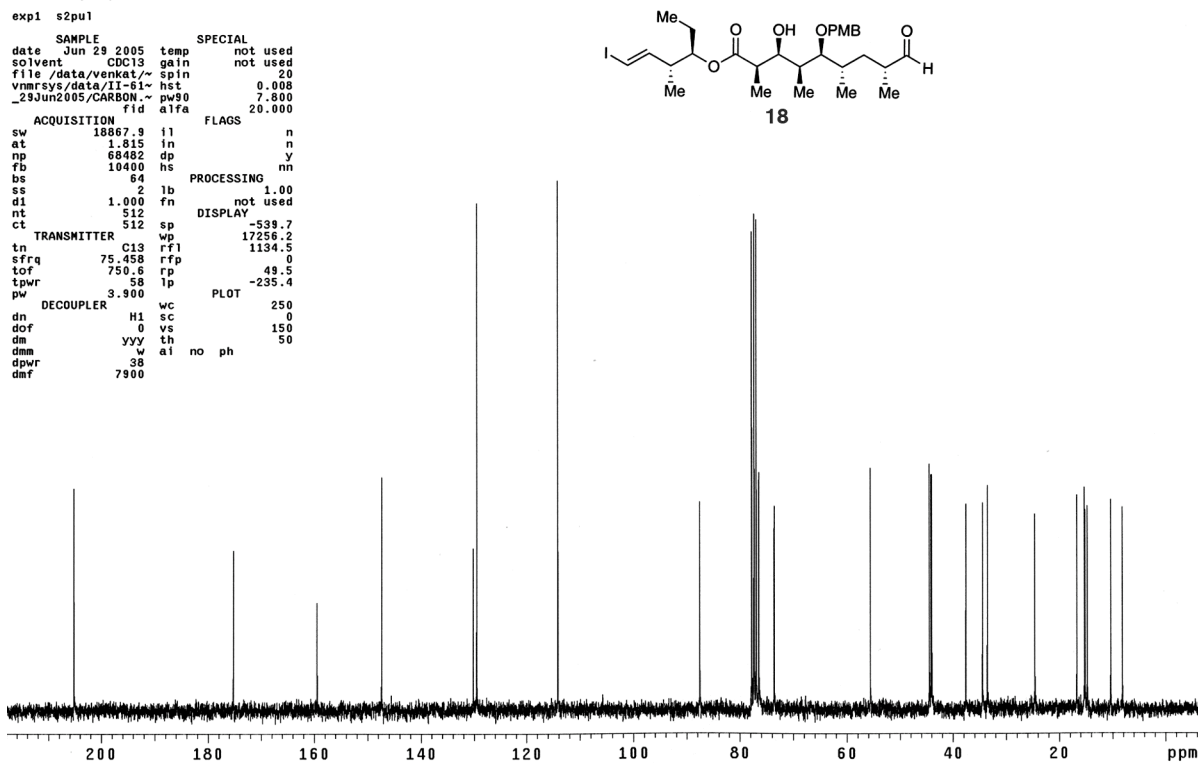

LV-II-62-F1p

Archive directory: /data/venkat/vnmrsys/data  
Sample directory: II-62-F1\_30Jun2005

Pulse Sequence: s2pu1

Solvent: CDCl<sub>3</sub>  
Ambient temperature  
File: PROTON  
Mercury-300BB "medicinal2"

Relax. delay 5.000 sec  
Pulse 45.0 degrees  
Acq. time 1.998 sec  
Width 4800.8 Hz  
16 repetitions  
OBSERVE H1, 300.0575957 MHz  
DATA PROCESSING  
FT size 32768  
Total time 2 min, 10 sec

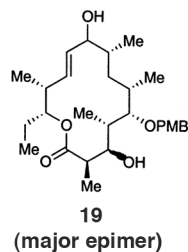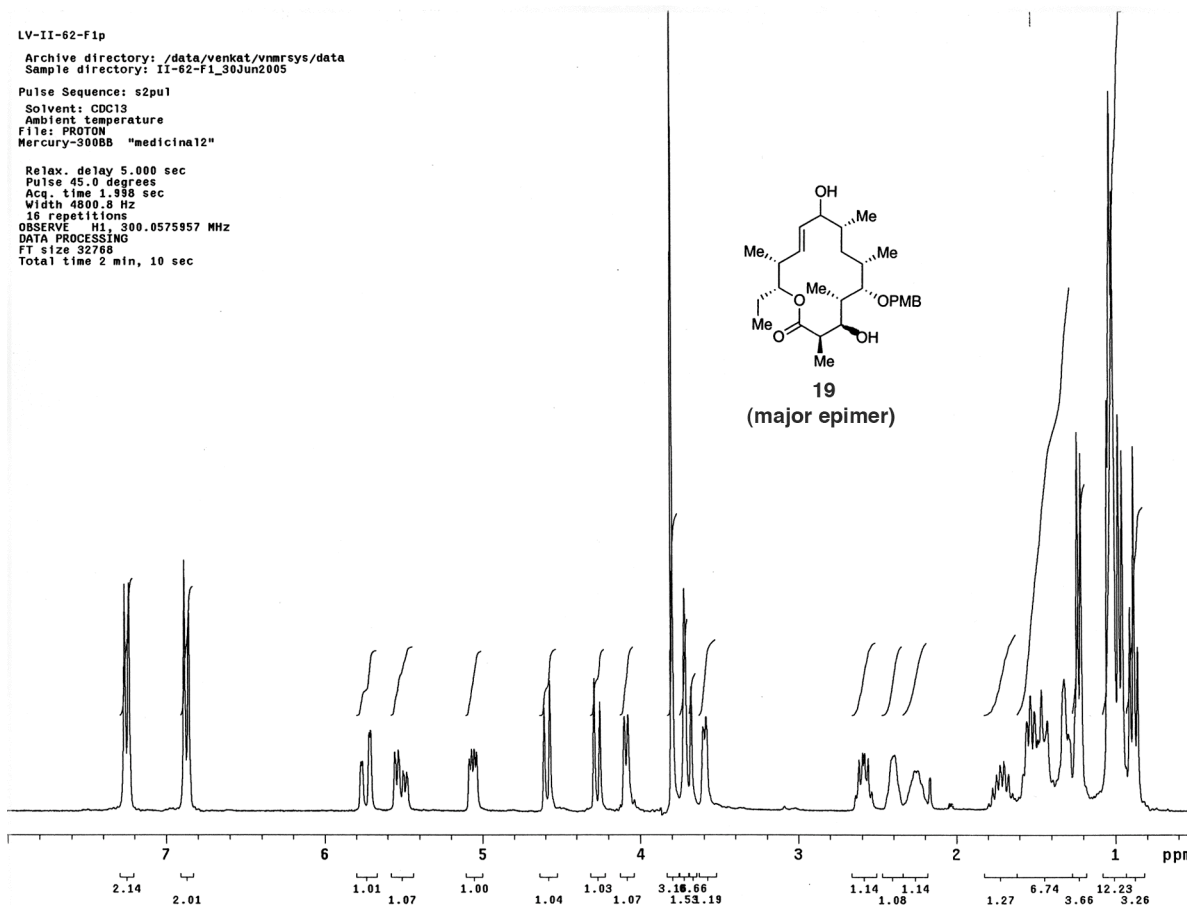

LV-II-62-F1p

Archive directory: /data/venkat/vnmrsys/data  
Sample directory: II-62-F1\_30Jun2005  
File: CARBON

Pulse Sequence: s2pu1

Solvent: CDCl<sub>3</sub>  
Ambient temperature  
Mercury-300BB "medicinal1"

Relax. delay 1.000 sec  
Pulse 45.0 degrees  
Acq. time 1.815 sec  
Width 18867.9 Hz  
1872 repetitions  
OBSERVE C13, 75.4495244 MHz  
DECOUPLE H1, 300.0590418 MHz  
Power 38 dB  
continuously on  
WALTZ-16 modulated  
DATA PROCESSING  
Line broadening 1.0 Hz  
FT size 131072  
Total time 1 hr, 37 min, 21 sec

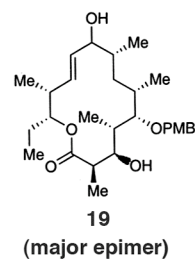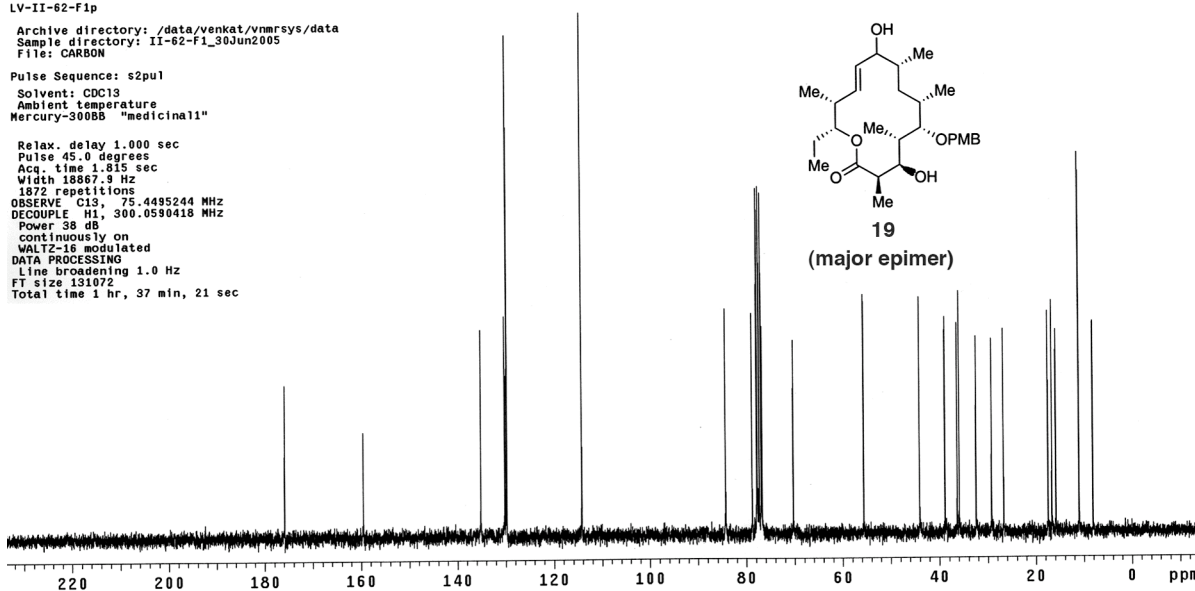

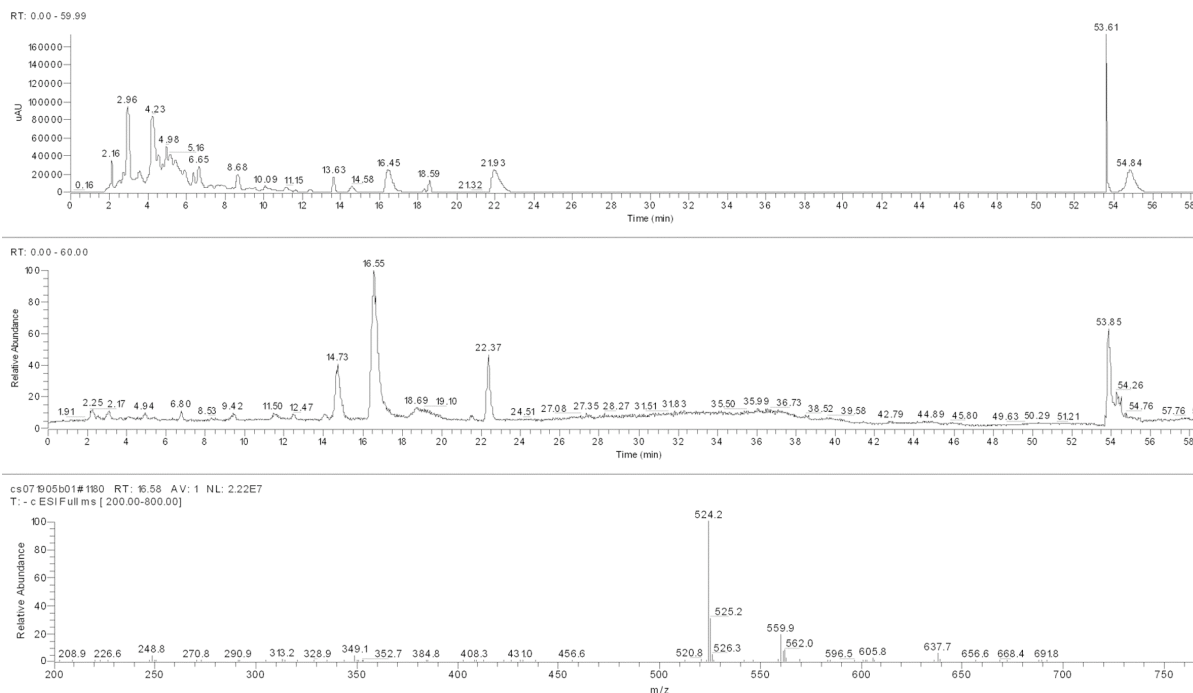

LC-MS trace of EtOAc extract from the crude fermentation broth after incubation of narbonolide with *S. venezuelae pikAI* deletion mutant BB138. LC peak at 16.45 min (top frame) corresponds to MS (ESI +) chromatogram peak at 16.55 (middle frame), with an extracted ion mass of 524 ( $M-H^+$ ) (bottom frame).

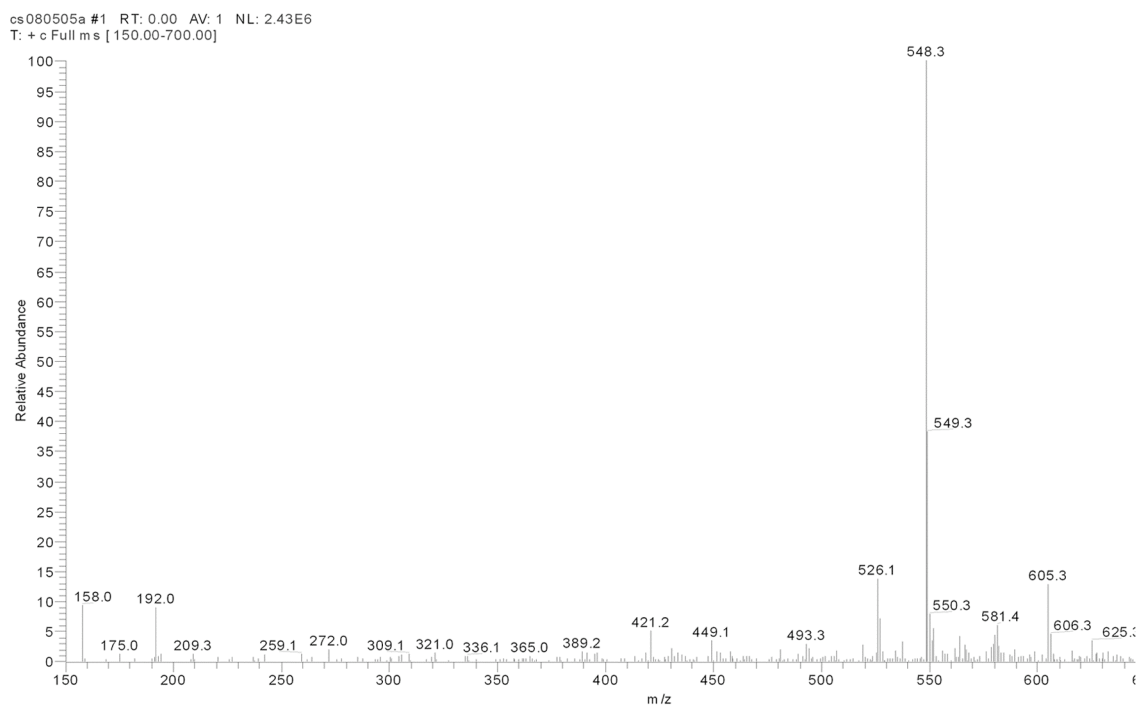

MS (ESI -) of pikromycin peak (10.4 min) collected from HPLC purification of narbonolide biotransformation: 548 ( $M^+ + Na$ ), 526 ( $M^+ + H^+$ ).

## References

- (1) Dess, D. B.; Martin, J. C. *J. Am. Chem. Soc.* **1991**, *113*, 7277–7287.
- (2) Ireland, R. E.; Liu, L. *J. Org. Chem.* **1993**, *58*, 2899.
- (3) Akey, D. L.; Kittendorf, J. D.; Giraldes, J. W.; Fecik, R. A.; Sherman, D. H.; Smith, J. L. *Nat. Chem. Biol.* **2006**, *2*, 537–542.
- (4) Pilli, R. A.; de Andrade, C. K. Z.; Souto, C. R. O.; de Meijere, A. *J. Org. Chem.* **1998**, *63*, 7811–7819.
